1 **TMS target comparison identifies motor network reorganization associated with**  
2 **behavioral improvement in writer's cramp dystonia: A randomized, double-blind,**  
3 **Sham-controlled clinical trial**

4  
5 **Author List:** Noreen Bukhari-Parlakturk, MD, PhD<sup>\*1,2</sup>, Patrick J. Mulcahey<sup>1</sup>, Michael W.  
6 Lutz, PhD<sup>1</sup>, Rabia Ghazi, MD<sup>1</sup>, Ziping Huang<sup>1</sup>, Moritz Dannhauer, PhD<sup>3</sup>, Pichet  
7 Termsarasab, MD<sup>4</sup>, Burton Scott, MD PhD<sup>1</sup>, Zeynep B. Simsek, MD<sup>1</sup>, Skylar Groves<sup>1</sup>,  
8 Mikaela Lipp<sup>1</sup>, Michael Fei<sup>1</sup>, Tiffany K. Tran<sup>1</sup>, Eleanor Wood<sup>5</sup>, Lysianne Beynel, PhD<sup>6</sup>,  
9 Chris Petty<sup>7</sup>, James T. Voyvodic, PhD<sup>2,7</sup>, Lawrence G. Appelbaum, PhD<sup>8</sup>, Hussein R. Al-  
10 Khalidi, PhD<sup>9</sup>, Simon W. Davis, PhD<sup>1,2</sup>, Andrew M. Michael, PhD<sup>2</sup>, Angel V. Peterchev,  
11 PhD<sup>2,10,11,12,13</sup>, Nicole Calakos, MD, PhD<sup>1,2,14</sup>

12  
13 **Affiliations:**

14 <sup>1</sup>Department of Neurology, Duke University School of Medicine, <sup>2</sup>Duke Institute for Brain  
15 Sciences, Duke University, <sup>3</sup>Department of Computer Science, East Carolina University,  
16 Greenville, North Carolina, <sup>4</sup>Department of Medicine, Faculty of Medicine Ramathibodi  
17 Hospital, Mahidol University, Bangkok, Thailand, <sup>5</sup>Drexel University College of Medicine,  
18 Philadelphia, Pennsylvania, <sup>6</sup>Non Invasive Neuromodulation Unit, Experimental  
19 Therapeutics and Pathophysiology Branch, National Institute of Mental Health, National  
20 Institute of Health, Bethesda, Maryland, <sup>7</sup>Brain Imaging & Analysis Center, Duke  
21 University School of Medicine, <sup>8</sup>Department of Psychiatry, University of California, San  
22 Diego, California, <sup>9</sup>Department of Biostatistics and Bioinformatics, Duke University  
23 School of Medicine, <sup>10</sup>Department of Psychiatry and Behavioral Sciences, Duke  
24 University School of Medicine, <sup>11</sup>Department of Electrical and Computer Engineering,  
25 Duke University, <sup>12</sup>Department of Neurosurgery, Duke University School of Medicine,  
26 <sup>13</sup>Department of Biomedical Engineering, Duke University, <sup>14</sup>Department of  
27 Neurobiology, Duke University School of Medicine, Durham, North Carolina, USA.

28  
29 **ABSTRACT**

30 **Background:** Writer's cramp (WC) dystonia is an involuntary movement disorder with  
31 distributed abnormalities in the brain's motor network. Prior studies established the  
32 potential for repetitive transcranial magnetic stimulation (rTMS) to either premotor cortex  
33 (PMC) or primary somatosensory cortex (PSC) to modify symptoms. However, clinical  
34 effects have been modest with limited understanding of the neural mechanisms  
35 hindering therapeutic advancement of this promising approach. **Objective:** This study  
36 aimed to understand the motor network effects of rTMS in WC that correspond with  
37 behavioral efficacy. We hypothesized that behavioral efficacy is associated with  
38 modulation of cortical and subcortical regions of the motor network. **Methods:** In a  
39 double-blind, cross-over design, twelve WC participants underwent weekly 10 Hz rTMS  
40 in one of three conditions (Sham-TMS, PSC-TMS, PMC-TMS) while engaged in a  
41 writing task to activate dystonic movements and measure writing fluency. Brain  
42 connectivity was evaluated using task-based fMRI after each TMS session. **Results:**  
43 10 Hz rTMS to PSC, but not PMC, significantly improved writing dysfluency. PSC-TMS  
44 also significantly weakened cortico-basal ganglia, cortico-cerebellum, and intra-  
45 cerebellum functional connectivity (FC), and strengthened striatal connectivity relative to  
46 Sham. Increased PSC BOLD activity was associated with reduced dysfluent writing

47 behavior. **Conclusions:** 10 Hz rTMS to PSC improved writing dysfluency by  
48 redistributing motor network connectivity and strengthening somatosensory-parietal  
49 connectivity. A key signature for effective stimulation at PSC and improvement in writing  
50 dysfluency may be strengthening of intra-cortical connectivity between primary  
51 somatosensory and superior parietal cortices. These findings offer mechanistic  
52 hypotheses to advance the therapeutic application of TMS for dystonia.

53

54 **\*Corresponding author:**

55 Noreen Bukhari-Parlakturk,  
56 DUMC Box 2900, Bryan Research Building  
57 311 Research Drive  
58 Durham, NC 27710  
59 919-660-4104  
60 [noreen.bukhari@duke.edu](mailto:noreen.bukhari@duke.edu)

61

62

63 Word Count: 5,509

64

65 **Key words:** writer's cramp, motor network, transcranial magnetic stimulation, dystonia

66

67 **Highlights:**

- 68 • 10 Hz repetitive TMS to somatosensory cortex reduces writing dysfluency in dystonia
- 69 • Increased somatosensory cortex activity correlates with reduced writing dysfluency
- 70 • In untreated dystonia, writing dysfluency correlates with cerebellar connectivity.
- 71 • 10 Hz rTMS to somatosensory cortex induces reorganization of the motor network
- 72 • Somatosensory-parietal connectivity may be a key signature for effective TMS

73

74 **Abbreviations:**

75

76 PSC: primary somatosensory cortex, PMC: motor and premotor cortex, WC: writer's  
77 cramp dystonia

78

79

80 **Running title:** Motor network reorganization improves WC.

81

82 **1. Introduction**

83 Writer's cramp (WC) dystonia is an adult-onset focal dystonia (1). Patients develop  
84 involuntary co-contractions of hand and arm muscles during the specific task of writing,  
85 resulting in abnormal and often repetitive upper limb postures that can be painful and  
86 functionally disabling (2). There are no disease-modifying therapies for dystonia, and  
87 current treatments provide symptomatic benefit that is short-lived and variable.

88 Repetitive transcranial magnetic stimulation (rTMS) is a noninvasive brain stimulation  
89 technology that, in a meta-analysis of 27 prior studies, showed some benefit in reducing  
90 dystonia symptoms (3). Across these studies, a predictor of benefit was the stimulation  
91 site, which varied according to the dystonia subtype. In dystonias outside of the upper

92 limb, such as cervical dystonia and blepharospasm, some behavioral benefits were  
93 reported after TMS to the cerebellum (2/6) and anterior cingulate cortex (3/3),  
94 respectively. In upper limb dystonia, behavioral benefit was reported after TMS to  
95 motor-premotor cortex (PMC) (9/18 studies) or primary somatosensory cortex (PSC)  
96 (1/18 studies) (3-5). Although PSC only showed benefit in one study, it is noteworthy  
97 that the reported behavioral benefit was more enduring (two to three weeks) than any of  
98 the nine PMC studies (3-5). To best resolve whether one target site is superior, a head-  
99 to-head comparison of PMC versus PSC target controlling for the other variables among  
100 these studies would be necessary.

101 In addition to the stimulation site, another predictor of TMS benefit was the stimulation  
102 parameters. In upper limb dystonia, behavioral benefit was reported after 1 Hz rTMS  
103 (6/18 studies), 0.2 Hz rTMS (1/18 studies), and continuous theta burst (TBS) TMS (2/18  
104 studies), while in cervical dystonia and blepharospasm, only TBS-TMS (2/5 studies) and  
105 0.2 Hz rTMS (3/3 studies) showed benefits respectively (3). Overall, some behavioral  
106 benefits were reported after TMS in adult focal dystonias, but these varied according to  
107 dystonia subtypes, with key factors being stimulation site and stimulation parameters.

108 To improve the clinical efficacy of TMS in dystonia, more clinical studies are needed to  
109 directly compare the previously effective stimulation sites and parameters within  
110 subject. In addition, advances in our understanding of the brain mechanism mediating  
111 TMS benefit irrespective of brain disorder is critical to enable future rational optimization  
112 of this promising noninvasive therapeutic modality. In Parkinson's disease, for example,  
113 10 Hz rTMS to the motor cortex was shown to increase dopamine release from the  
114 basal ganglia (4). In Wilson's disease, the same 10 Hz rTMS protocol to the motor  
115 cortex improved upper limb dystonia (5). Taken together, these independent studies  
116 suggest that 10 Hz rTMS to the motor cortex may improve upper limb dystonia by  
117 modifying subcortical regions of the motor circuit. No study to date has tested the role of  
118 10 Hz rTMS in individuals with adult focal dystonias. Collectively, comparative and  
119 mechanistic TMS studies are critically needed to guide further refinements in TMS  
120 protocols to achieve clinically meaningful and enduring benefits across multiple dystonia  
121 subtypes.

122 Here, we aimed to build on prior TMS studies by directly comparing two stimulation sites  
123 that have reported efficacy in WC dystonia. We further aim to identify the brain  
124 mechanism mediating TMS-induced behavioral benefit by performing functional MRI in  
125 the acute stimulation period. The primary hypothesis was that the stimulation site that  
126 will show symptom benefit after TMS will modify key subcortical brain regions known to  
127 play a role in the dysfunctional motor network of dystonia. In a double-blind, cross-over  
128 study design, a 10 Hz rTMS was applied to either PMC or PSC and compared to Sham  
129 rTMS over the course of three independent sessions, allowing for a reliable within-  
130 subject comparison of stimulation site efficacy with several critical parameters being  
131 held constant.

## 132 **2. Materials and methods:**

133 **2.1 Study design:** The study was a double-blind Sham-controlled cross-over design  
134 with data collected at Duke University Hospital between September 2018 and  
135 September 2022. The study was approved by the Duke Health Institutional Review  
136 Board (IRB # 0094131), registered on [clinicaltrials.gov](https://clinicaltrials.gov) (NCT 06422104), and performed  
137 in accordance with the Declaration of Helsinki. All participants gave written informed  
138 consent prior to any study participation. Inclusion criteria were adults (> 18 years),  
139 diagnosed with isolated right-hand dystonia by a Movement Disorder Specialist, more  
140 than three months from the last botulinum toxin injection, more than one month from  
141 trihexyphenidyl medication, and able to sign an informed consent form. Exclusion  
142 criteria were any contraindications to receiving MRI or TMS.

143 **2.2 MRI data acquisition and preprocessing:** All study participants completed a brain  
144 imaging scan pre-TMS, and those who qualified also completed it after each TMS visit.  
145 All anatomical and functional imaging data was collected on a 3 Tesla GE scanner  
146 equipped with an 8-channel head coil. The anatomical MRI scan was acquired using a  
147 T1-weighted echo-planar sequence with the following parameters: voxel size: 256 x 256  
148 matrix, repetition time (TR) = 7.316 ms, echo time (TE) = 3.036 ms, field of view (FOV)  
149 = 25.6 mm, 1 mm slice thickness. During fMRI sequences, participants copied holo-  
150 alphabetic sentences on an MRI-compatible writing tablet. The sentence writing was  
151 performed in a block design alternated by rest blocks (**Fig. 1, task-fMRI panels**). The  
152 CIGAL software presented visual writing instructions and recorded participants'  
153 movements during the fMRI scan (6). Pre-TMS fMRI: Functional echo-planar images  
154 were acquired using the following parameters: voxel size: 3.5 x 3.5 x 4.0mm<sup>3</sup>, flip angle  
155 90°, TR = 2 s, TE = 30 ms, FOV = 22 mm for 37 interleaved slices in ascending order,  
156 writing block: 20 s, rest block: 16 s, total: 12 blocks per fMRI. Post-TMS fMRI:  
157 Functional echo-planar images were acquired with the following parameters: voxel size:  
158 2.0 x 2.0 x 3.0mm<sup>3</sup>, flip angle 90°, TR = 2.826 s, TE = 25 ms, FOV = 25.6 mm for 46  
159 slices. Writing block: 20 s, rest block: 20 s, total: 5 blocks x 6 runs = 30 blocks per fMRI.  
160 fMRI images were preprocessed using fMRIPrep (7), as detailed in the supplementary  
161 methods. fMRIs with excessive head movements (defined as mean frame-wise  
162 displacement > 0.5 mm) were excluded from the study.

163  
164 **2.3 MRI signal analysis:** Pre-processed pre-TMS fMRIs from were input into FEAT  
165 analysis in FSL software version 6.0 (FMRIB, Oxford, UK) to generate a subject-level  
166 statistical map. A general linear model in which writing task timing (block design) was  
167 convolved with a double-gamma hemodynamic response function to generate the  
168 statistical brain map. To account for head motions, fMRIPrep reported regressors (CSF,  
169 white matter, framewise displacement, and motion outliers) were regressed out from  
170 each statistical map. Spatial smoothing with a Gaussian kernel of full-width half-  
171 maximum of 5 mm and temporal high pass filter cutoff of 100 seconds was applied  
172 during the FEAT analysis. A WC group-level statistical map was then computed by  
173 importing all WC participants' statistical brain maps from their baseline task-fMRI into a  
174 mixed-effects FLAME1 model.

175  
176 **2.4 Personalized TMS target selection:** For each TMS study participant, a two-voxel  
177 cortical brain mask was generated for TMS targeting to the premotor and motor cortex  
178 (PMC) and for TMS targeting to the primary somatosensory cortex (PSC). To constrain

179 the stimulation target to the PMC and PSC regions, each participant's statistical brain  
180 map was overlaid on the WC group statistical brain map, and anatomical masks for  
181 precentral (for PMC) and postcentral gyrus (for PSC) from the Harvard-Oxford MNI atlas  
182 and the participant's anatomical scan. Two consecutive voxels in the anatomic region of  
183 the left precentral/postcentral gyrus, with peak activation in the participant's statistical  
184 map and the WC group statistical map and within 1 cm from the scalp surface were  
185 selected as the fMRI-guided PMC and PSC target for TMS delivery (**Fig. 1, target  
186 selection panel**). The fMRI-guided cortical brain masks were then used to perform  
187 prospective electric field (E-field) modeling on each participant's scalp, as detailed in the  
188 supplementary methods. The purpose of the modeling was to identify the optimal  
189 position and orientation of the TMS coil on the participant's scalp. This optimal coil setup  
190 was then used for the TMS intervention in the neuronavigation system (Brainsight,  
191 Rogue Research, Canada, version 2.4.9). The final personalized TMS targets at left  
192 PMC and left PSC for the 12 WC participants are shown overlaid on the MNI brain  
193 (**Fig. 2**).

194 **2.5 TMS stimulation:** Eligible participants received three TMS visits. The three TMS  
195 visits consisted of 10 Hz rTMS to PSC, 10 Hz rTMS to PMC, and Sham rTMS to PMC  
196 (**Fig. 1, rTMS panel**). Each rTMS visit was separated by a minimum of one week to  
197 allow signal washout. To negate any order effect, each participant was randomized to  
198 one of six possible orders for the three TMS conditions. All TMS was performed using  
199 an A/P Cool B65 coil attached to a MagVenture R30 device (MagVenture, Farum,  
200 Denmark). During each TMS visit, participants first completed an optimal motor cortex  
201 localization and motor threshold calculation as detailed in the supplementary methods  
202 (8). The active TMS paradigm delivered to each cortical target was 25 trains applied at  
203 10 Hz rTMS with biphasic pulses and an inter-train interval of 10 seconds at 90%  
204 resting motor threshold (RMT) for a total of 1000 pulses delivered in a single block  
205 (~five minutes), while participants were sitting in a recliner. To ensure a consistent brain  
206 state and specifically target the stimulation to the motor network, each stimulation block  
207 was preceded by a writing block (~five minutes) in which participants performed a  
208 sentence copying task. A total of four blocks of TMS alternated with four writing blocks  
209 were performed (a total of 4000 pulses per TMS visit) (**Fig. 1, rTMS panel**). To perform  
210 Sham stimulation, the same AP coil was used in placebo mode, which produced clicking  
211 sounds and somatosensory sensation from scalp electrodes similar to the active mode  
212 but without a significant electric field induced in the brain (9). As previously reported,  
213 this type of stimulation allows participants to stay blinded during the experiment.

214 **2.6 Retrospective TMS coil deviations:** During each TMS block, data on the  
215 experimental TMS coil location and orientation was recorded every 500 ms in the  
216 neuronavigation system and snapped to scalp reconstruction mode prior to exporting it.  
217 Data was then imported into SimNIBS software (version 2.0.1 / 3.2.6) to calculate the  
218 deviations from the intended TMS coil position and orientation using the retrospective  
219 Targeting and Analysis Pipeline (TAP) (10). The TMS coil placement (position and  
220 orientation) data were first extruded outwards along the scalp normal by adjusting it for  
221 the participant's recorded hair thickness for each TMS visit. These TMS coil placement  
222 data were then used to compute the coil placement deviation from the optimized coil  
223 setup constructed during the prospective E-field modeling reported in the

224 supplementary methods. The deviations in the TMS coil placement were calculated in  
225 the normal and tangential planes and reported as changes in distance (mm) and angle  
226 (degrees). The direct distance between the actual and optimized target was also  
227 calculated, as previously reported (10, 11). Due to technical issues with the  
228 neuronavigation software, the experimental TMS coil location and orientation during one  
229 TMS block was excluded from one participant's Sham TMS visit.

230 **2.7 TMS-induced behavior changes:** During each TMS visit, participants performed a  
231 behavioral writing assay before and after each four-block TMS session (**Fig. 1,**  
232 **behavior assessment panels**). The behavioral assay consisted of participants using a  
233 sensor-based pen on a digital tablet (MobileStudio Pro13; Wacom Co, Ltd, Kazo,  
234 Japan). Participants copied a holo-alphabetic sentence ten times in a writing software  
235 (MovAlyzer, Tempe, AZ, USA). The sensor-based pen recorded the x, y, and z positions  
236 and the time function of the participants' writings. The writing software then  
237 automatically transformed the writing samples' position parameters and time functions  
238 using a Fast Fourier transform algorithm to calculate the kinematic features. A  
239 previously detailed analysis of these kinematic writing measures showed that the sum of  
240 acceleration peaks in a single sentence (henceforth peak accelerations) (**Fig. 1,**  
241 **behavior assessment panel, black circles**) demonstrates high diagnostic potential  
242 (sensitivity, specificity, and intra-participant reliability), and associates with patient-  
243 reported dystonia and disability scales (12). In this study, the peak accelerations  
244 measure was used as the primary behavioral outcome measure. Participants performed  
245 the behavioral assessment before and after each TMS session. To minimize learning  
246 across the three TMS visits, a different holo-alphabetic sentence was used for each  
247 sequential visit. The three sentences were: Pack my box with five dozen liquor jugs; The  
248 quick brown fox jumps over the lazy dog; Jinxed wizards pluck blue ivy from the big  
249 quilt. To measure the change in peak accelerations, each participant's post-TMS  
250 measure was normalized by the mean of their pre-TMS measure using the following  
251 equation: [(Post-TMS peak accelerations per sentence)/(mean peak accelerations for all  
252 ten sentences pre-TMS)]\*100. Higher measures of peak accelerations represent greater  
253 writing dysfluency and worsening dystonia. The standard TMS adverse events survey  
254 and secondary outcome measures of clinician-rated and participant-reported dystonia  
255 scales were also collected before and after each TMS session as detailed in the  
256 supplementary methods.

257 **2.8 TMS-induced fMRI changes:** After each TMS visit, participants completed a task-  
258 based fMRI. The fMRI task design, acquisition settings, preprocessing, and run-level  
259 analyses are detailed in methods section 2.2 and 2.3 above. To compare changes in  
260 BOLD activity across the three TMS conditions, 4D time-series data were extracted  
261 from each fMRI run level FEAT directory using brain masks for regions of interest. The  
262 time-series data for each region of interest was z-scored across runs and analyzed as  
263 on-block and off-block writing epochs. To perform functional connectivity analysis, the  
264 extracted 4D time-series data for each region of interest was correlated pairwise using  
265 Pearson's correlation (R) and Fisher z-transformed.

266  
267 **2.9 Brain parcellation and ROI extraction:** To compare BOLD activity and functional  
268 connectivity analysis across TMS conditions, brain masks corresponding to regions of

269 the motor network previously identified as abnormal in human dystonia studies were  
270 prepared (13-21). Anatomical brain masks were prepared using the Harvard-Oxford  
271 MNI brain atlas for the following subcortical regions: left caudate (CAU), left putamen  
272 (PUT), left globus pallidus (PAL), left thalamus (THL), left subthalamic nucleus (STN)  
273 and left substantia nigra (SN). Since the cortex and cerebellum are large brain regions,  
274 brain masks for these regions were made using the publicly available Dictionaries of  
275 Functional Modes (DiFuMo) brain atlas (22). DiFuMo is a fine-grain atlas that  
276 parcellated the brain into functional regions of 1024 components based on data from  
277 15,000 statistical brain maps spanning 27 studies (22). To select DiFuMo brain masks  
278 for the left superior parietal cortex (SPC), left inferior parietal cortex (IPC), left  
279 supplementary motor area (SMA), and right cerebellar lobules VI and VIII (CBL), MNI  
280 coordinates from prior neuroimaging studies in dystonia were used (15, 23). For PSC  
281 and PMC, each participant's personalized TMS target (section 2.4) was used as the  
282 center to prepare a custom 5 mm spherical mask.

283  
284 **2.9 Statistical Analyses:** Because the study was a cross-over design with multiple  
285 visits and measures, a Mixed Model for Repeated Measures (MMRM) statistical  
286 analysis was used to compare differences within participants across the three TMS  
287 conditions. For the measure of TMS coil deviations, the MMRM covariate was the TMS  
288 condition. For examiner rating scales, the covariates were TMS condition, TMS visit,  
289 and clinician rater. For patient rating scales, the covariates were TMS condition and  
290 TMS visit. For the measures of peak accelerations, BOLD activity, and functional  
291 connectivity analyses, the covariates were TMS condition, visit, and interaction of TMS  
292 condition\*visit. Differences across participants were accounted for by including  
293 participants as a random effect variable. To focus on clinically meaningful differences  
294 induced by TMS, functional connectivities that showed small effect sizes (defined as  
295 Cohen's  $D \leq |0.2|$ ) between active and Sham conditions were excluded from statistical  
296 analyses. Changes in BOLD activity during the on-block and off-block writing were  
297 analyzed separately using MMRM. To perform brain-behavior correlation, BOLD activity  
298 or functional connectivity was correlated within participants with their measure of  
299 normalized peak acceleration behavior using Pearson's (R). To compare differences in  
300 brain-behavior correlation across TMS conditions, a generalized regression analysis  
301 was performed. For the generalized regression, the dependent variable was peak  
302 accelerations, covariates were TMS conditions, BOLD activity or functional connectivity,  
303 and the interaction term (TMS condition\*BOLD activity/functional connectivity). All  
304 MMRM were fit using restricted maximum likelihood. Covariance structures of the  
305 unstructured, autoregressive first order, and compound symmetry were tested and  
306 evaluated for stability of the model fit and ability to converge. Compound symmetry  
307 reached convergence for all of the models and, therefore, was utilized. All p values were  
308 corrected for multiple comparisons using the method of Benjamini-Hochberg, with an  
309 alpha of 0.05 accepted as statistically significant. For the exploratory functional  
310 connectivity to behavior correlational analysis, a less stringent alpha threshold of 0.1  
311 was accepted as statistically significant.

312  
313 **RESULTS:**

314 **Clinical characteristics:** Thirty-four participants were assessed for study eligibility  
315 (**Fig. 3**). Of those assessed for eligibility, 24 WC participants met the inclusion/exclusion  
316 criteria to participate in the TMS study and completed a baseline fMRI before the first  
317 stimulation visit. The baseline fMRI from five participants was excluded due to other  
318 neurological disorders, structural abnormalities on the MRI brain, or excess head  
319 motion. FMRI from 19 WC participants were then used to identify a group-targeting  
320 approach for TMS. Of these 19 participants, 14 consented to participate in the TMS  
321 research visits. Two participants who consented to TMS visits were taking a medication  
322 that increased the risk of seizures and, therefore, were excluded from undergoing TMS.  
323 Twelve WC participants (11/1 males/female; mean age 55 [SD 12.91] years) completed  
324 all three TMS visits. Due to technical issues during data collection, one participant's  
325 TMS visit (Sham) was removed from the data analysis. Thus, data from 12 WC  
326 participants and 35 TMS visits (12 participants x 3 conditions – 1 visit = 35) were used  
327 for all analyses in this study. None of the 12 WC participants reported any adverse side  
328 effects of TMS. The mean symptom duration for the 12 WC participants was 16.4 years  
329 [SD 15.54].

330 **No differences in TMS technical delivery:** To evaluate the technical delivery of TMS,  
331 the position and orientation of the TMS coil during the three conditions were analyzed  
332 retrospectively. There were no significant differences in the position or orientation of the  
333 TMS coil across the three conditions (**Fig. 4 and Supplementary Table 1**). Therefore,  
334 TMS delivery across the three conditions was technically comparable.

335 **10 Hz rTMS to PSC, but not PMC, improved writing dysfluency:** In a within-  
336 participant comparative design, in which all participants received stimulation to both  
337 sites and at the same frequency, we found that 10 Hz rTMS to PSC significantly  
338 decreased writing dysfluency compared to Sham-TMS (**Fig. 5**) [PSC vs. Sham: -1.73,  
339 SE: 0.41,  $t(21)$ : -4.22,  $p = 0.001$ ] and PMC-TMS [PSC vs. PMC: -1.28, SE 0.40,  $t(21)$ :  
340 3.23,  $p = 0.012$ ]. TMS to PMC did not show significant differences in writing dysfluency  
341 compared to Sham [PMC vs. Sham: -0.45, SE 0.41,  $t(21)$ : -1.09,  $p = 0.639$ ]. These  
342 results confirm prior studies that TMS can modify behavior in WC dystonia and show  
343 the first results using 10 Hz frequency, within-participant site comparisons, and delivery  
344 under a task-activated brain state. Across the clinician rating (BFM right arm dystonia  
345 and WCRS movement score) and participant-reported scales (BFM writing score and  
346 ADDS), there were small but consistent improvements in dystonia symptoms after PSC-  
347 TMS compared to Sham (**Supplementary Table 2**, “Difference” column, positive values  
348 represent an improvement, and negative values represent worsening dystonia).  
349 However, the effect sizes of these coarse categorical rating scales were small and had  
350 large variability, resulting in no statistical differences across the three TMS conditions.

351 **10 Hz rTMS to both PMC and PSC decreased subcortical activity in the motor**  
352 **network.** Considering the differential effect of the stimulation site on behavioral  
353 outcomes, we examined the extent to which TMS at these two target sites affected brain  
354 BOLD activity (**Fig. 6A**). Across the motor network, stimulation at each of the two TMS  
355 target sites showed similar patterns of brain activation (**Fig. 6B**). Specifically, 10 Hz  
356 rTMS decreased subcortical brain activity and increased BOLD activity at the superior  
357 parietal cortex. In the cerebellum, the brain activation pattern varied by TMS target site.



358 PMC-TMS decreased BOLD activity in lobules VI and VIII, while PSC-TMS decreased  
359 BOLD activity in lobule VI only. Overall, these results suggest that cortically delivered 10  
360 Hz rTMS decreased deep brain activity in the motor network with an overall activation  
361 pattern that was similar across the two stimulation sites. Changes in BOLD activity after  
362 TMS, therefore, do not explain the differential effect of stimulation site on behavioral  
363 outcomes.

364 **PSC-TMS modified subcortical connectivity, distinct from PMC-TMS.** We next  
365 considered if the behavioral outcome differences between the stimulation sites also  
366 corresponded to changes in functional connectivity (FC) after TMS. **Figure 7** illustrates  
367 the changes in the magnitude of brain connections induced by PSC-TMS compared to  
368 Sham. In general, PSC-TMS weakened cortico-striatal connectivity (thin lines: PMC-  
369 CAU, PSC-CAU), cortico-cerebellar connectivity (SPC-CBLVI), and intra-cerebellar  
370 connectivity (CBL VI-VIII). PSC-TMS also strengthened striato-cerebellar connectivity  
371 (thick lines: PAL-CBL-VI) and striato-nigral connectivity (PUT-SN) (**Table 1**). There were  
372 no connections that showed significant differences between PMC-TMS compared to  
373 Sham. Overall, these findings demonstrate two important points. 10 Hz rTMS to PSC  
374 interleaved with writing task predominantly changed subcortical brain connectivity.  
375 Second, changes in brain connectivity induced by TMS may explain the differential  
376 effect of stimulation sites on behavioral outcomes.

377 **TMS-induced activation of PSC is associated with a reduction in writing**  
378 **dysfluency.** We next asked if there was a relationship between TMS-induced brain  
379 activation and behavior changes and if this relationship was dependent on the  
380 stimulation site. A brain activity-behavior correlational analysis was performed for all  
381 brain regions in **Table 1** that showed significant differences in functional connectivity  
382 between PSC-TMS and Sham. Among all these regions, only PSC BOLD activity  
383 showed a significant correlation with peak acceleration behavior. Specifically, TMS-  
384 induced increase in PSC BOLD activity was associated with a significant reduction of  
385 peak accelerations in WC participants ( $R = -0.84$ ,  $p = 0.02$ ) (**Fig. 8**). In contrast, no  
386 brain-behavior correlations were observed after TMS to PMC ( $R = -0.39$ ,  $p = 0.75$ ) or  
387 Sham ( $R = 0.15$ ,  $p = 0.76$ ). When compared across TMS conditions, there was a  
388 significant difference in brain activity-behavior association between PSC-TMS and  
389 Sham (PSC vs. Sham =  $-3.32$ ,  $p = 0.0084$  generalized regression and multiple  
390 comparisons corrected). Collectively, these results suggest that TMS-induced changes  
391 in the association between brain activity and behavioral measures were dependent on  
392 the stimulation site, and TMS-induced activation of PSC was associated with a  
393 reduction in writing dysfluency.

394 **Reorganization of the motor network after PSC-TMS was associated with reduced**  
395 **writing dysfluency.** Lastly, we explored if there was an association between TMS-  
396 induced changes in functional connectivity and behavior in the motor network and if this  
397 association was dependent on the stimulation site. From this analysis, we made three  
398 observations (**Fig. 9**). First, under Sham-TMS condition (untreated dystonia),  
399 nine significant FC relationships with writing dysfluency were identified, with the majority  
400 of them in connection to the cerebellum (cortico-cerebellum, subcortical-cerebellum,  
401 intra-cerebellum). Second, compared to the Sham, correlations between writing

402 dysfluency and FC involving the cerebellum were no longer present following 10 Hz  
403 rTMS at either PMC or PSC. The loss of FC-behavior correlations in these regions was  
404 observed to a greater extent after PSC-TMS than PMC-TMS. Third, PSC-TMS differed  
405 from the other stimulation sites in brain-behavior correlations at cortical (PSC-SPC) and  
406 subcortical (CAU-SN, PUT-PAL, PUT-SN) brain regions (**Fig. 9B, indicated by the “+”**  
407 **sign**). Of these cortical and subcortical connections, PSC-TMS significantly differed  
408 from Sham in brain-behavior associations at the cortico-cortical (PSC-SPC) connection  
409 (PSC vs. Sham: -14.6,  $p = 0.075$ , generalized regression, multiple comparisons  
410 corrected) (**Fig. 9A**). Collectively, these results demonstrated that reduced writing  
411 dysfluency after PSC-TMS may be mediated by loss of brain-behavior associations to  
412 the cerebellum, and/or gain of brain-behavior associations to cortical and subcortical  
413 brain regions. Furthermore, the association between writing dysfluency and intracortical  
414 connectivity (PSC-SPC) may be a key signature for brain-behavior changes after PSC-  
415 TMS.

416  
417 Overall, TMS target comparison demonstrated that 10 Hz rTMS to the primary  
418 somatosensory cortex but not the premotor cortex significantly changed functional  
419 connectivity and markedly redistributed brain-behavior associations that spanned  
420 cortical and subcortical regions of the motor network.

## 421 422 **DISCUSSION**

423 The present study compared the efficacy of two TMS cortical sites in reducing dystonic  
424 behavior, each previously shown to be beneficial in separate dystonia studies, and  
425 aimed to identify the TMS-induced brain mechanism underlying the observed behavioral  
426 improvement. We report three key findings. First, 10 Hz rTMS to the primary  
427 somatosensory cortex significantly reduced writing dysfluency compared to Sham and  
428 10 Hz rTMS to the premotor cortex. These results establish the efficacy of 10 Hz rTMS  
429 to the PSC for future clinical trials in this rare brain disorder. Second, we identified that  
430 TMS to the same region may have improved behavior by changing subcortical  
431 connectivity in the motor network. Third, we demonstrate that the intra-cortical  
432 connectivity between primary somatosensory and superior parietal cortices is a key  
433 predictor for effective stimulation at PSC. Collectively, the present study represents the  
434 first deep phenotyping of the brain and behavior changes induced by TMS in a dystonia  
435 cohort. Findings will guide future refinements in TMS protocols to achieve clinically  
436 meaningful and enduring benefits in this rare brain disorder.

437 Our first principal study finding was that 10 Hz rTMS to PSC significantly reduced  
438 writing dysfluency in WC dystonia. The twenty-minute PSC-TMS session showed an  
439 effect size of 0.96 compared to Sham. This effect size is among the highest reported for  
440 TMS studies in dystonia. Since the cortical gyri for PSC and PMC lie adjacent to the  
441 central sulcus, the differential stimulation response to these regions also demonstrated  
442 the cortical selectivity of our TMS effect. It is interesting that prior (9/18) studies reported  
443 a behavioral benefit after PMC-TMS (3). The majority of these studies, however,  
444 delivered 1 Hz rTMS to PMC. Therefore, the finding that PSC is a more effective  
445 stimulation site than PMC may vary by stimulation frequency. Specifically, this study  
446 showed that PSC may be more effective than PMC using 10 Hz rTMS frequency. Future

447 studies are needed to test if PMC or PSC may be more effective using 1 Hz rTMS  
448 frequency. Additionally, the brain state during TMS delivery may also affect the  
449 stimulation site efficacy. In this study, TMS was interleaved with a writing task to ensure  
450 the motor circuit was engaged during brain stimulation, while in prior studies, TMS was  
451 interleaved with periods of rest. Since the brain state during stimulation delivery can  
452 change the plasticity-inducing mechanism (long-term potentiation vs. long-term  
453 depression) (24), the stimulation at rest in prior studies may have induced a plasticity  
454 mechanism that may be different than the present study. Overall, our study expands the  
455 range of effective TMS parameters for adult focal hand dystonia and raises the  
456 possibility that the efficacy of the stimulation site may be a function of the stimulation  
457 frequency and brain state during TMS delivery.

458 Our second principal finding was that 10 Hz rTMS to PSC induced significant changes  
459 in subcortical connectivity in the motor network. This was an important study question to  
460 guide future refinements in therapeutic applications of TMS in dystonia, where  
461 subcortical regions such as basal ganglia and cerebellum play key roles. It is unknown  
462 whether active TMS improves behavior by weakening or strengthening brain  
463 connections. Our study shows that both weakening and strengthening of connections  
464 are present resulting in TMS-induced reorganization of the motor network. The strong  
465 inverse association between stimulation site (PSC BOLD activity) and writing dysfluency  
466 behavior (Fig. 8) further supports the mechanism that TMS to PSC begins a cascade of  
467 connectivity changes, similar to a molecular signaling cascade, that collectively at the  
468 network level result in reduction of writing dysfluency behavior. Overall, the present  
469 study adds important insights to the TMS-induced brain mechanism that contributes to  
470 motor behavior benefits in dystonia.

471 A third novel study finding was that the behavioral benefit after PSC-TMS was  
472 specifically associated with strengthening intra-cortical connectivity between the  
473 somatosensory cortex and superior parietal cortex. This is consistent with a prior TMS  
474 study, which showed that 1 Hz rTMS to the primary somatosensory cortex also  
475 activated the superior parietal cortex in WC dystonia (25). The superior parietal cortex is  
476 critically important for somatosensory discrimination by providing a mental model of the  
477 extremity function (26). Strengthening of the somatosensory to parietal connectivity  
478 may, therefore, be a key mechanism for developing a more accurate mental model of  
479 the hand-arm function, which in turn may mediate the reduction in dysfluent writing  
480 behavior. Impairment of superior parietal cortex activation has also been reported in  
481 other adult focal dystonias, including spasmodic dysphonia and cervical dystonia (27,  
482 28). Future studies should also compare the efficacy of TMS at the parietal cortex,  
483 premotor cortex, and somatosensory cortex to determine if the activation of the parietal  
484 cortex may be a more effective target for improving somatosensory dysfunction in focal  
485 dystonias.

486 To our knowledge, this is the first interventional study to identify relationships between  
487 brain connectivity and dystonic behavior in the untreated dystonia syndrome to inform  
488 the pathophysiology. A prior study using a systematic review of lesion-induced dystonia  
489 across 359 published cases identified that focal upper limb dystonia was most  
490 commonly caused by lesions in the basal ganglia and thalamus (29). The present study

491 also supports these findings by demonstrating that three of the four brain-behavior  
492 connections that differentiate the effective stimulation site of PSC from noneffective  
493 stimulation sites of PMC and Sham conditions are connections to or within the basal  
494 ganglia regions (caudate-substantia nigra, putamen-pallidum, putamen-substantia  
495 nigra). More importantly, the present study demonstrates that the brain connectivity  
496 pattern of subregions of the motor network is responsive to change in a direction that  
497 improves behavior after PSC-TMS compared to Sham. This brain connectivity to  
498 behavior patterns can, therefore, be used as a screening tool for future interventional  
499 trials in dystonia.

500 The brain-behavior relationships identified in this study also provide greater insight into  
501 the cerebellum's role in dystonia. Prior neuroimaging studies observed that greater  
502 disease duration in WC participants correlated with negative cortico-cerebellar  
503 connectivity (14). Our study also identified cortico-cerebellar circuitry as potentially  
504 clinically relevant. WC participants after Sham showed a direct correlation between  
505 cortico-cerebellar connectivity and writing dysfluency, a relationship that was absent  
506 after PSC-TMS. Our results further support a causal role of this circuitry because TMS  
507 to PSC leads to less writing dysfluency and a significant loss of correlation between  
508 cortico-cerebellar connectivity and writing dysfluency. Our study also proposes key  
509 associations between subcortical-cerebellum and intra-cerebellar connectivity and  
510 behavior of writing dysfluency that warrant further investigation in future studies.

511 A key role of the cerebellum has also been described in individuals with cervical  
512 dystonia. A brain network derived from lesion network mapping and applied in rest-fMRI  
513 from cervical dystonia and healthy controls demonstrated that positive connectivity to  
514 the cerebellum and negative connectivity to the somatosensory cortex were specific  
515 markers for cervical dystonia (30). Furthermore, two weeks of cTBS-TMS to the bilateral  
516 cerebellum resulted in clinical improvement in cervical dystonia (31). In DYT1-TOR1A  
517 dystonia, tractography examining cerebellar outflow tracts showed that lower measures  
518 of white matter were associated with poorer performance in a sequence learning task  
519 (32). To the extent that other dystonias may share circuit mechanisms involving reduced  
520 cerebellar connectivity, our results advance the potential for 10 Hz rTMS to PSC to be  
521 used as a corrective approach.

522 There are several limitations of the present study to discuss. First, this study consisted  
523 of a small study cohort. Nonetheless, our approach here is that small, focused studies  
524 that deeply phenotype brain-behavior relationships using a within-subject repeated  
525 study design, as performed in the present study, can provide key insights into brain-  
526 behavior relationships in individuals with a disease to guide clinical care (33). Second,  
527 this study only examined acute responses. Future studies are needed to examine the  
528 longevity of this TMS effect and explore whether increasing stimulation sessions  
529 prolongs the duration of behavioral effects. Third, a potential confounding effect of the  
530 present study is that two active stimulations and one Sham condition were randomly  
531 assigned to each participant across three sequential study visits. Future studies  
532 dedicated to a single stimulation site would remove this potential confound and allow us  
533 to evaluate the longevity of each TMS condition. A fourth limitation of the present study  
534 is that we constrained analyses to the motor network because of its relevance to

535 dystonia and to reduce multiple hypothesis testing in a study with limited group sizes.  
536 There may be significant effects in regions outside of the motor circuitry that warrant  
537 consideration if we use larger dystonia study cohorts.

## 538 CONCLUSION

539 In summary, identifying the optimal stimulation site for engaging and improving the  
540 abnormal motor circuit mechanisms in dystonia is a major goal necessary for effectively  
541 applying TMS-related interventions for dystonia. This study used a within-participant,  
542 Sham-controlled study design in writer's cramp dystonia, coupled with functional  
543 neuroimaging and behavior, to address these unknowns. Demonstrating that TMS to  
544 PSC provides a significant behavioral benefit is a critical first step in moving TMS  
545 toward clinical therapy for dystonia. Furthermore, delineating the TMS-induced  
546 corrective changes in the motor network associated with behavioral improvement in  
547 dystonia generates mechanistic hypotheses to guide future therapeutic interventions.  
548 The pattern of brain-behavior changes observed after PSC-TMS in this study may also  
549 serve as a brain signature for a clinical response to use as a screening tool with other  
550 interventional modalities.

551 **Data statement:** All data and codes are available upon reasonable request.

552  
553 **Authorship contribution statement:** NBP, MWL, HRA, LGA, SWD, AVP, and NC  
554 conceptualized the study. NBP, TKT, EW, and LB collected study data. NBP, PJM,  
555 MWL, RG, ZH, MD, ZBS, SG, ML, MF and AMM performed data analysis. PT and BS  
556 performed clinician rating scales. CP and JV provided software codes to assist with data  
557 collection and analysis. MWL and HRA critiqued the statistical analysis. MWL, SWD,  
558 AMM, AVP, and NC critiqued the data analysis. NBP and NC wrote the manuscript. All  
559 co-authors reviewed and edited the manuscript.

560  
561 **Conflict of interest:** All authors report no conflicts of interest.

562  
563 **Declaration of competing interests:** NBP serves as a member of the DMRF Medical  
564 and Scientific Advisory Council. AVP serves on the editorial board of the Brain  
565 Stimulation journal. AVP is an inventor of patents and patent applications on  
566 transcranial magnetic stimulation technology and has received patent royalties and  
567 consulting fees from Rogue Research; equity options, scientific advisory board  
568 membership, and consulting fees from Ampa Health; equity options and consulting fees  
569 from Magnetic Tides; consulting fees from Soterix Medical; equipment loans from  
570 MagVenture; and research funding from Motif. SWD has received consulting fees from  
571 Neuronetics. None of these sources played a role in the design, collection, analysis,  
572 interpretation of the data, or in the decision to submit the manuscript for publication.  
573 PJM, MWL, RG, ZH, MD, ZBS, SG, ML, TKT, EW, LB, CP, JTV, LGA, HRA, AMM and  
574 NC report no relevant financial disclosures.

575  
576 **Acknowledgements:** This work was supported by grants to NBP from Dystonia  
577 Medical Research Foundation (Clinical Fellowship Training Program), Doris Duke  
578 Charitable Foundation (Fund to Retain Clinician Scientists), American Academy of

579 Neurology (career development award) and NIH NCATS (1KL2TR002554). NBP was  
580 also supported by a career development award from the Dystonia Coalition (NS065701,  
581 TR001456, NS116025) which is part of the National Institutes of Health (NIH) Rare  
582 Disease Clinical Research Network (RDCRN), supported by the Office of Rare  
583 Diseases Research (ORDR) at the National Center for Advancing Translational Science  
584 (NCATS), and the National Institute of Neurological Diseases and Stroke (NINDS).  
585 AVP's contributions were supported in part by the National Institutes of Health  
586 (R01MH128422, R01NS117405). The content is solely the responsibility of the authors  
587 and does not necessarily represent the official views of the funding agencies.  
588

## 589 REFERENCES

- 591 1. Ortiz R, Scheperjans F, Mertsalmi T, Pekkonen E. The prevalence of adult-onset isolated  
592 dystonia in Finland 2007-2016. *PLoS One*. 2018;13(11):e0207729.
- 593 2. Albanese A, Bhatia K, Bressman SB, Delong MR, Fahn S, Fung VS, et al.  
594 Phenomenology and classification of dystonia: a consensus update. *Mov Disord*.  
595 2013;28(7):863-73.
- 596 3. Morrison-Ham J, Clark GM, Ellis EG, Cerins A, Joutsa J, Enticott PG, et al. Effects of  
597 noninvasive brain stimulation in dystonia: a systematic review and meta-analysis. *Ther*  
598 *Adv Neurol Disord*. 2022;15:17562864221138144.
- 599 4. Strafella AP, Ko JH, Grant J, Fraraccio M, Monchi O. Corticostriatal functional  
600 interactions in Parkinson's disease: a rTMS/[11C]raclopride PET study. *Eur J Neurosci*.  
601 2005;22(11):2946-52.
- 602 5. Hao W, Wei T, Yang W, Yang Y, Cheng T, Li X, et al. Effects of High-Frequency  
603 Repetitive Transcranial Magnetic Stimulation on Upper Limb Dystonia in Patients With  
604 Wilson's Disease: A Randomized Controlled Trial. *Front Neurol*. 2021;12:783365.
- 605 6. Voyvodic JT. Real-time fMRI paradigm control, physiology, and behavior combined  
606 with near real-time statistical analysis. *Neuroimage*. 1999;10(2):91-106.
- 607 7. Esteban O, Ciric R, Finc K, Blair RW, Markiewicz CJ, Moodie CA, et al. Analysis of  
608 task-based functional MRI data preprocessed with fMRIPrep. *Nat Protoc*.  
609 2020;15(7):2186-202.
- 610 8. Awiszus F. TMS and threshold hunting. In: Elsevier, ed. In *Supplements to Clinical*  
611 *neurophysiology*; 2003:13-23.
- 612 9. Smith JE, Peterchev AV. Electric field measurement of two commercial active/Sham  
613 coils for transcranial magnetic stimulation. *J Neural Eng*. 2018;15(5):054001.
- 614 10. Dannhauer M, Huang Z, Beynel L, Wood E, Bukhari-Parlakturk N, Peterchev AV. TAP:  
615 targeting and analysis pipeline for optimization and verification of coil placement in  
616 transcranial magnetic stimulation. *J Neural Eng*. 2022;19(2).
- 617 11. Gomez LJ, Dannhauer M, Peterchev AV. Fast computational optimization of TMS coil  
618 placement for individualized electric field targeting. *Neuroimage*. 2021;228:117696.
- 619 12. Bukhari-Parlakturk N, Lutz MW, Al-Khalidi HR, Unnithan S, Wang JE, Scott B, et al.  
620 Suitability of Automated Writing Measures for Clinical Trial Outcome in Writer's  
621 Cramp. *Mov Disord*. 2023;38(1):123-32.
- 622 13. Vo A, Nguyen N, Fujita K, Schindlbeck KA, Rommal A, Bressman SB, et al. Disordered  
623 network structure and function in dystonia: pathological connectivity vs. adaptive  
624 responses. *Cereb Cortex*. 2023;33(11):6943-58.

- 625 14. Dresel C, Li Y, Wilzeck V, Castrop F, Zimmer C, Haslinger B. Multiple changes of  
626 functional connectivity between sensorimotor areas in focal hand dystonia. *J Neurol*  
627 *Neurosurg Psychiatry*. 2014;85(11):1245-52.
- 628 15. Gallea C, Horovitz SG, Najee-Ullah M, Hallett M. Impairment of a parieto-premotor  
629 network specialized for handwriting in writer's cramp. *Hum Brain Mapp*.  
630 2016;37(12):4363-75.
- 631 16. Simonyan K, Cho H, Hamzehei Sichani A, Rubien-Thomas E, Hallett M. The direct basal  
632 ganglia pathway is hyperfunctional in focal dystonia. *Brain*. 2017;140(12):3179-90.
- 633 17. Zhuang P, Li Y, Hallett M. Neuronal activity in the basal ganglia and thalamus in patients  
634 with dystonia. *Clin Neurophysiol*. 2004;115(11):2542-57.
- 635 18. Argyelan M, Carbon M, Niethammer M, Ulug AM, Voss HU, Bressman SB, et al.  
636 Cerebellothalamocortical connectivity regulates penetrance in dystonia. *J Neurosci*.  
637 2009;29(31):9740-7.
- 638 19. Iacono D, Geraci-Erck M, Peng H, Rabin ML, Kurlan R. Reduced Number of Pigmented  
639 Neurons in the Substantia Nigra of Dystonia Patients? Findings from Extensive  
640 Neuropathologic, Immunohistochemistry, and Quantitative Analyses. *Tremor Other*  
641 *Hyperkinet Mov (N Y)*. 2015;5.
- 642 20. Kaji R, Bhatia K, Graybiel AM. Pathogenesis of dystonia: is it of cerebellar or basal  
643 ganglia origin? *J Neurol Neurosurg Psychiatry*. 2018;89(5):488-92.
- 644 21. Gianni C, Pasqua G, Ferrazzano G, Tommasin S, De Bartolo MI, Petsas N, et al. Focal  
645 Dystonia: Functional Connectivity Changes in Cerebellar-Basal Ganglia-Cortical Circuit  
646 and Preserved Global Functional Architecture. *Neurology*. 2022;98(14):e1499-e509.
- 647 22. Dadi K, Varoquaux G, Machlouzarides-Shalit A, Gorgolewski KJ, Wassermann D,  
648 Thirion B, et al. Fine-grain atlases of functional modes for fMRI analysis. *Neuroimage*.  
649 2020;221:117126.
- 650 23. Horovitz SG, Gallea C, Najee-Ullah M, Hallett M. Functional anatomy of writing with  
651 the dominant hand. *PLoS One*. 2013;8(7):e67931.
- 652 24. Enomoto H, Terao Y, Kadowaki S, Nakamura K, Moriya A, Nakatani-Enomoto S, et al.  
653 Effects of L-Dopa and pramipexole on plasticity induced by QPS in human motor cortex.  
654 *J Neural Transm (Vienna)*. 2015;122(9):1253-61.
- 655 25. Havrankova P, Jech R, Walker ND, Operto G, Tauchmanova J, Vymazal J, et al.  
656 Repetitive TMS of the somatosensory cortex improves writer's cramp and enhances  
657 cortical activity. *Neuro Endocrinol Lett*. 2010;31(1):73-86.
- 658 26. Kaas J. Somatosensory System. In: JK PGM, ed. *The Human Nervous System*. London:  
659 Elsevier Academic Press; 2004:1061-93.
- 660 27. Battistella G, Simonyan K. Top-down alteration of functional connectivity within the  
661 sensorimotor network in focal dystonia. *Neurology*. 2019;92(16):e1843-e51.
- 662 28. Naumann M, Magyar-Lehmann S, Reiners K, Erbguth F, Leenders KL. Sensory tricks in  
663 cervical dystonia: perceptual dysbalance of parietal cortex modulates frontal motor  
664 programming. *Ann Neurol*. 2000;47(3):322-8.
- 665 29. Corp DT, Greenwood CJ, Morrison-Ham J, Pullinen J, McDowall GM, Younger EFP, et  
666 al. Clinical and Structural Findings in Patients With Lesion-Induced Dystonia:  
667 Descriptive and Quantitative Analysis of Published Cases. *Neurology*.  
668 2022;99(18):e1957-e67.

- 669 30. Corp DT, Joutsa J, Darby RR, Delnooz CCS, van de Warrenburg BPC, Cooke D, et al.  
670 Network localization of cervical dystonia based on causal brain lesions. *Brain*.  
671 2019;142(6):1660-74.
- 672 31. Koch G, Porcacchia P, Ponzio V, Carrillo F, Caceres-Redondo MT, Brusa L, et al. Effects  
673 of two weeks of cerebellar theta burst stimulation in cervical dystonia patients. *Brain*  
674 *Stimul*. 2014;7(4):564-72.
- 675 32. Carbon M, Argyelan M, Ghilardi MF, Mattis P, Dhawan V, Bressman S, et al. Impaired  
676 sequence learning in dystonia mutation carriers: a genotypic effect. *Brain*. 2011;134(Pt  
677 5):1416-27.
- 678 33. Gratton C, Nelson SM, Gordon EM. Brain-behavior correlations: Two paths toward  
679 reliability. *Neuron*. 2022;110(9):1446-9.  
680  
681



682  
683

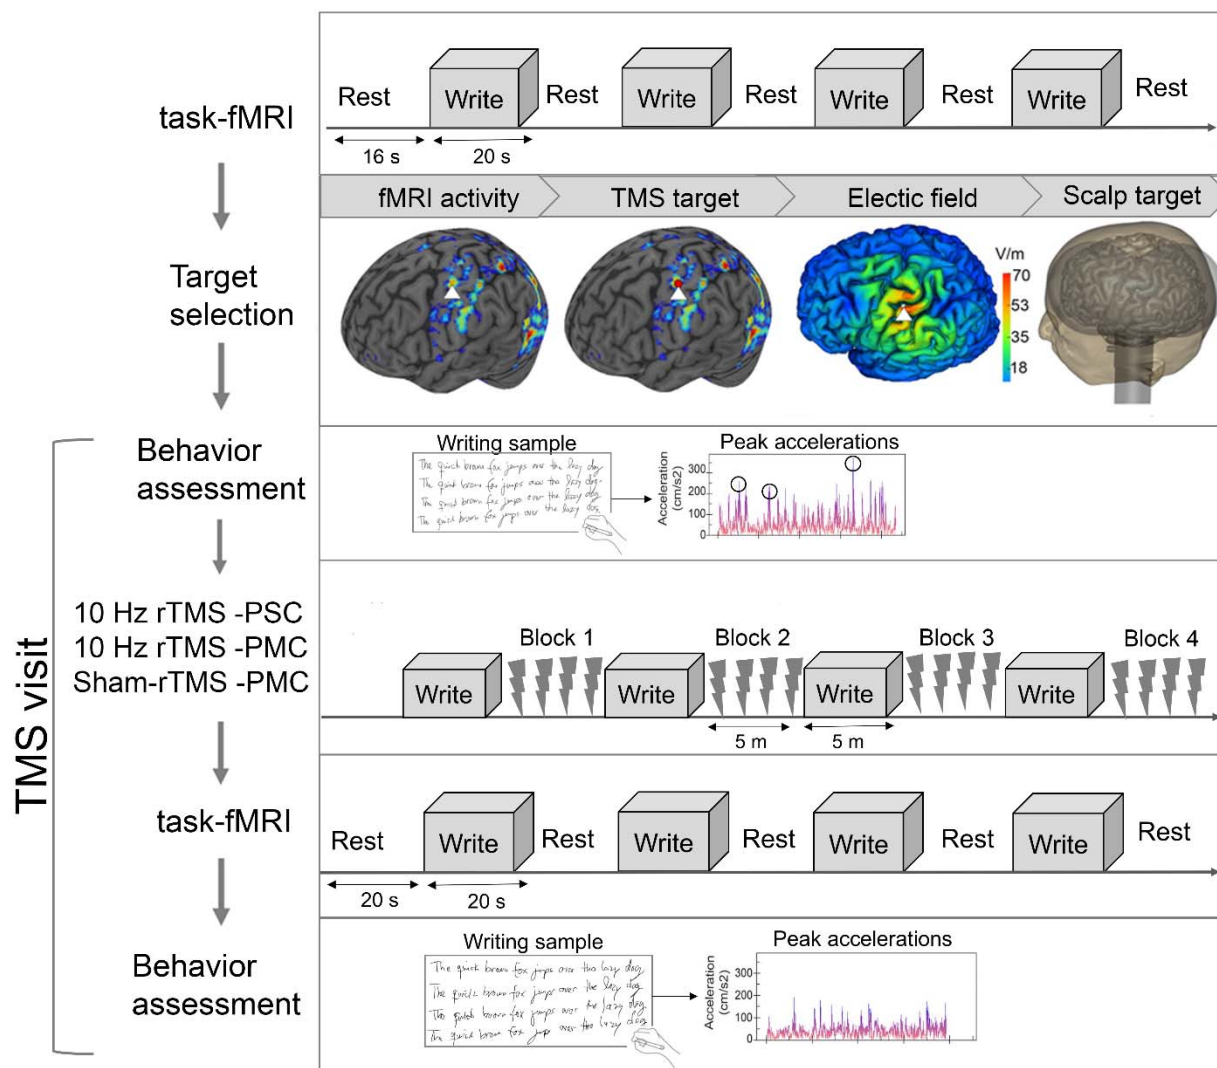

684  
685  
686  
687  
688  
689  
690  
691  
692  
693  
694  
695  
696  
697  
698

**Figure 1: TMS target selection and TMS delivery.** To select a scalp target for TMS delivery, each subject completed a task-based fMRI at baseline. An individualized scalp target to the motor/premotor cortex (PMC) and primary somatosensory cortex (PSC) was then prepared using fMRI and electric field modeling. Subjects received three TMS conditions: 10 Hz rTMS to PSC, 10 Hz rTMS to PMC, and Sham rTMS to PMC (total 4,000 pulses). Each TMS condition was delivered over four stimulation blocks during a single visit. To synchronize the brain state and activate the motor network during TMS delivery, stimulation blocks were interleaved with writing blocks. TMS effect was measured using writing behavior and task-based fMRI.

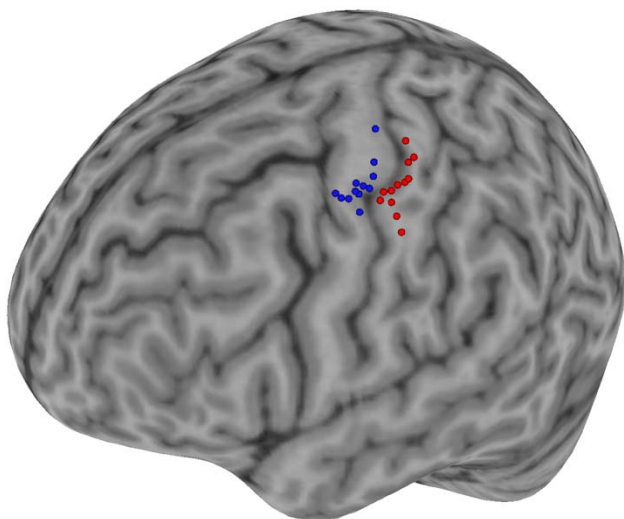

699  
700  
701  
702  
703  
704  
705  
706  
707  
708  
709

**Figure 2: Individualized targets for rTMS to PMc and PSc in WC.** The cortical target for rTMS delivery to the left PMc (blue) and left PSc (red) was developed using fMRI and electric field modeling. The final target for PMc-TMS and PSc-TMS for each WC participant is shown overlaid on a standard MNI brain.

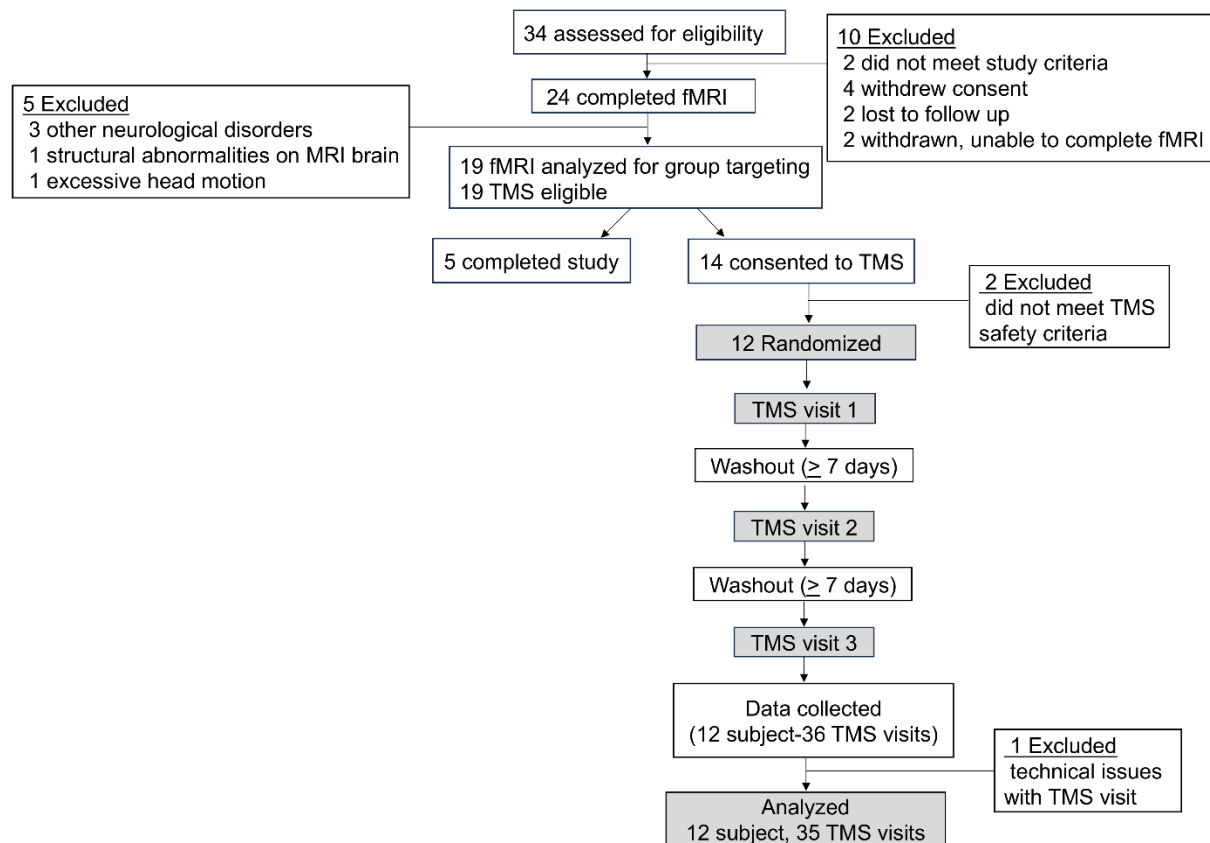

710  
711  
712  
713  
714  
715  
716

**Figure 3: Consort diagram showing the recruitment, inclusion, and exclusion numbers for participants.** A total of 34 WC dystonia participants were screened. Twenty-four participants completed fMRI, and 14 consented to the TMS study. Of these, 12 participants were randomized and completed the TMS study.

717  
718

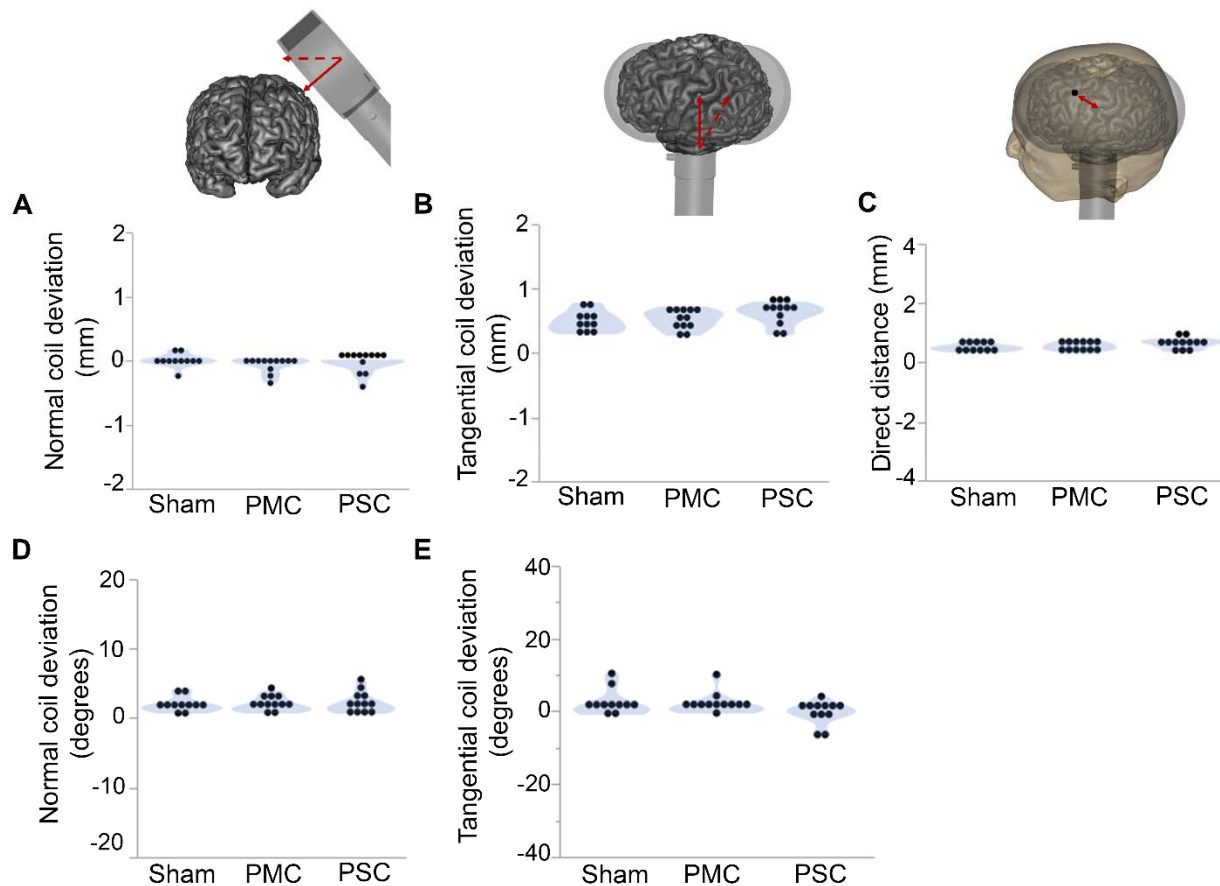

719  
720  
721  
722  
723  
724  
725  
726  
727  
728  
729  
730  
731  
732

**Figure 4: Minimal deviation between intended and actual TMS scalp targets.** Each graph shows the deviation in the TMS coil setup, defined as the difference between the intended and actual TMS coil parameters for the three TMS conditions. The deviation in TMS coil position is measured in the normal plane (**A**) and tangential plane (**B**). The direct distance between the intended TMS coil position and the actual TMS coil position is also measured (**C**). The deviation in TMS coil orientation is also presented in the normal plane (**D**) and tangential plane (**E**). Each data point on a graph represents the mean TMS coil deviation across all four TMS blocks for each subject. Data are presented for Sham-rTMS (n = 11), 10 Hz rTMS to PMC (n = 12), and 10 Hz rTMS to PSC (n = 12).

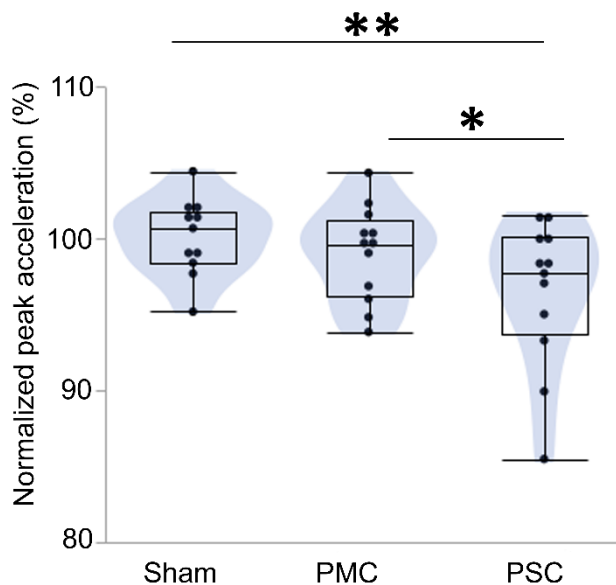

733  
734  
735  
736  
737  
738  
739  
740  
741  
742  
743  
744  
745  
746

**Figure 5: 10 Hz rTMS to PSC, but not PMC, reduced writing dysfluency in WC.** 10 Hz rTMS to PSC significantly reduced a measure of writing dysfluency called peak accelerations compared to Sham-TMS in a within-subject analysis in WC subjects. PMC did not show significant differences in writing dysfluency compared to Sham-TMS. Each data point represents the mean change in peak accelerations for each TMS condition, with higher measures representing worsening writing dysfluency. \*\* $p < 0.01$ , \* $p < 0.05$  after multiple comparisons correction.

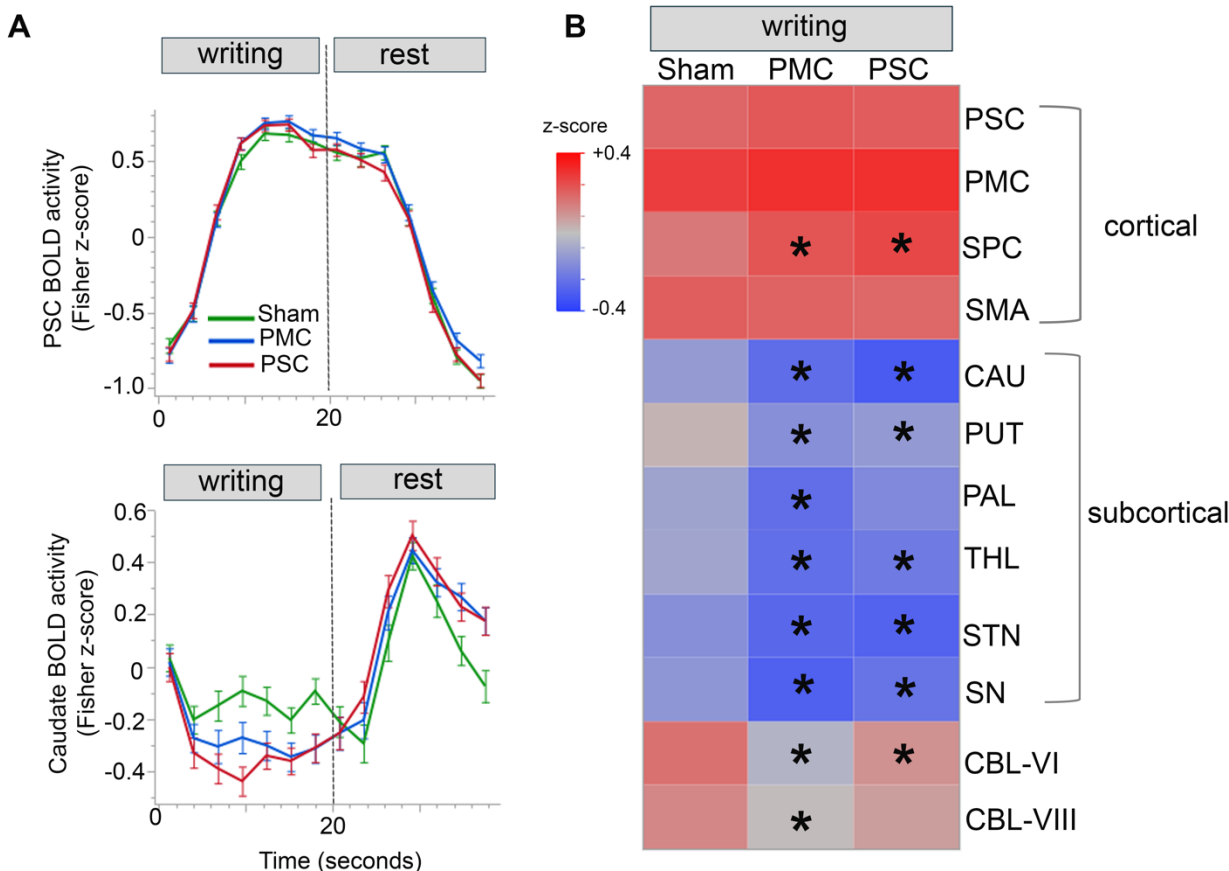

747  
748  
749  
750  
751  
752  
753  
754  
755  
756  
757  
758  
759  
760  
761  
762  
763  
764  
765  
766  
767  
768  
769  
770  
771

**Figure 6: 10 Hz rTMS to either PMC or PSC decreased subcortical activity in the motor network. A)** Graphs represent mean BOLD activity during the writing and rest blocks after each TMS condition [Sham (green), PMC-TMS (blue), and PSC-TMS (red)]. The mean BOLD activity is presented for brain regions of the primary somatosensory cortex (PSC, top graph) and caudate (bottom graph, PSC vs. Sham:  $-0.19$ ,  $p = 1.65 \times 10^{-5}$ , PMC vs. Sham:  $-0.14$ ,  $p = 2.8 \times 10^{-4}$ , PSC vs. PMC:  $0.05$ ,  $p = 0.14$ ). **B)** Heatmap represents mean BOLD activity during the writing block for subregions of the motor network across the three TMS conditions. Asterisks indicate significant differences in mean BOLD activity for PMC-TMS or PSC-TMS compared to Sham (MMRM and multiple comparisons corrected). SPC: superior parietal cortex, SMA: supplementary motor area, CAU: caudate, PUT: putamen, PAL: pallidum, THL: thalamus, STN: subthalamic nucleus, SN: substantia nigra, CBL-VI: cerebellum, lobule VI and CBL-VIII: cerebellum, lobule VIII.

772  
773  
774  
775  
776  
777  
778  
779

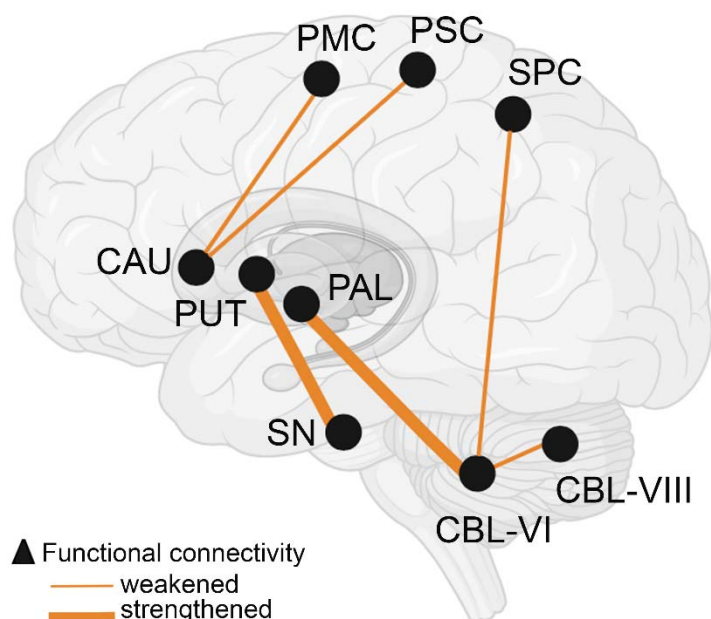

780  
781  
782  
783  
784  
785  
786  
787  
788  
789  
790  
791  
792  
793  
794  
795  
796  
797  
798  
799  
800  
801

**Figure 7: 10 Hz rTMS to PSC but not PMC-induced changes in cortical-subcortical connectivity in the motor network.** Connectome represents TMS-induced changes in functional connectivity in the motor network. Each line represents a connection between two regions (black circles) of the motor network. Only connections that showed significant change after PSC-TMS compared to Sham were presented ( $p < 0.05$  after multiple comparisons correction). There were no connections that showed significant change after PMC-TMS compared to Sham. The magnitude of connectivity change is represented by the line thickness (thin line: weakened, thick line: strengthened) and values reported in Table 1.

802  
803  
804  
805  
806  
807  
808  
809

**Table 1: Changes in functional connectivity induced by PSC-TMS compared to Sham in the motor network**

| Brain Regions          | Functional connections | Multiple Repeated Measures Analysis          |              |         |          |
|------------------------|------------------------|----------------------------------------------|--------------|---------|----------|
|                        |                        | PSC vs. Sham Mean difference in FC (z-score) | SE (z-score) | t-ratio | p-value* |
| Cortico-striatal       | PMC-CAU                | -0.17                                        | 0.04         | -4.49   | 0.015    |
|                        | PSC-CAU                | -0.13                                        | 0.03         | -4.17   | 0.015    |
| Cortico-cerebellar     | SPC-RCBL-VIII          | -0.15                                        | 0.05         | -3.38   | 0.048    |
| Subcortico-subcortical | PAL-CBL-VI             | +0.17                                        | 0.05         | 3.61    | 0.041    |
|                        | PUT-SN                 | +0.16                                        | 0.04         | 3.53    | 0.042    |
| Intra-cerebellar       | R-CBL VI-VIII          | -0.18                                        | 0.04         | -4.28   | 0.015    |
|                        | R-CBL VI-VIII          | -0.20                                        | 0.05         | -4.12   | 0.015    |

810  
811  
812

**SE:** Standard Error, \*p-values after multiple comparison adjustment



813  
814  
815

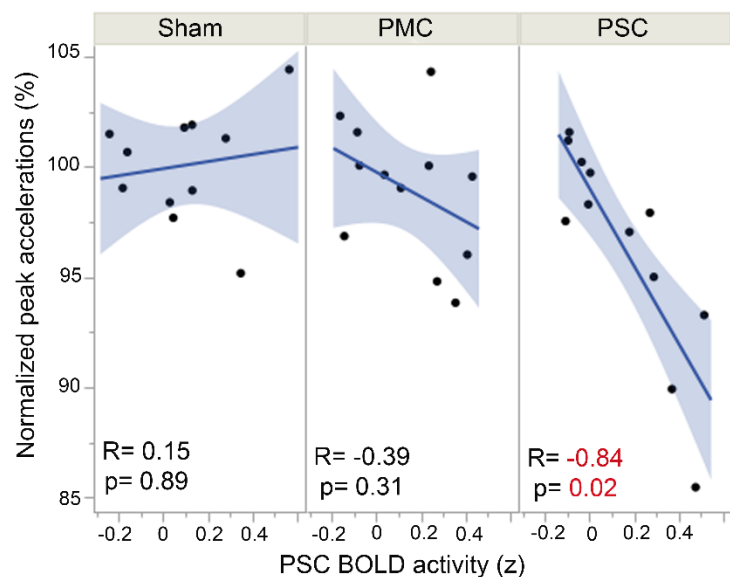

816  
817

**Figure 8: TMS-induced increase in BOLD activity at primary somatosensory cortex correlated with reduced writing dysfluency.** Graph represents the correlation between BOLD activity at the primary somatosensory cortex (x-axis) and behavior of peak accelerations (y-axis) for the three TMS conditions. Each data point represents the correlation between a WC participant's PSC BOLD activity and peak accelerations behavior for each TMS condition. The shaded blue region represents the confidence region for the fitted lines. PSC vs. Sham difference = -3.32,  $p=0.0084$  generalized regression and multiple comparisons corrected.

826  
827  
828  
829  
830  
831  
832  
833  
834  
835  
836  
837  
838  
839  
840  
841  
842

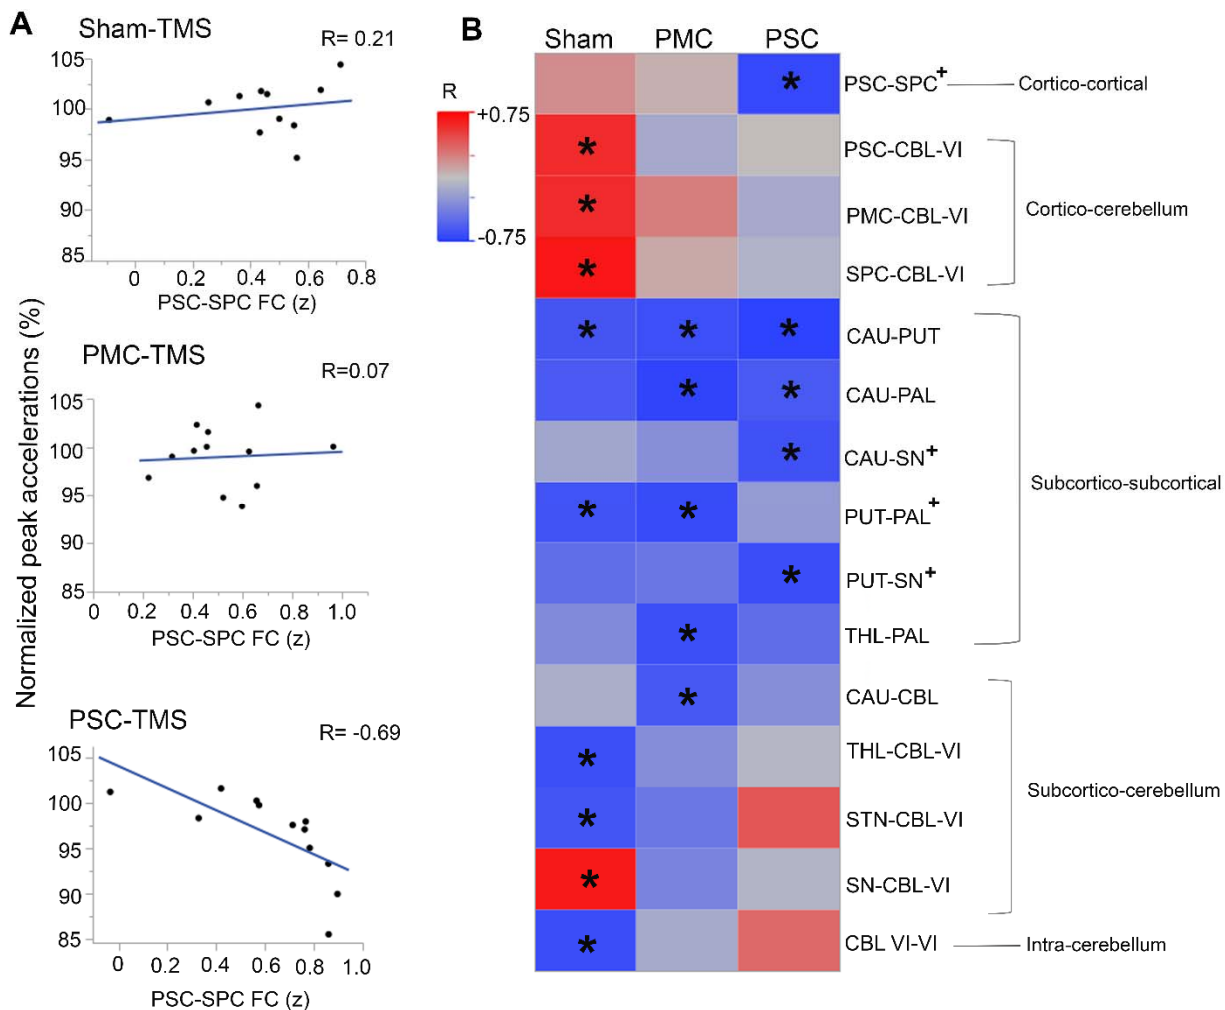

843  
844  
845  
846  
847  
848  
849  
850  
851  
852  
853  
854  
855  
856  
857  
858  
859  
860  
861

**Figure 9: Reorganization of the motor network after PSC-TMS correlated with reduced writing dysfluency.** **A)** Graph represents the correlation between functional connectivity (FC) (x-axis) and peak acceleration behavior (y-axis) for the three TMS conditions. Each data point represents a WC participant's connectivity-behavior relationship. Strengthening of connectivity between the primary somatosensory cortex and superior parietal cortex was associated with a reduction in peak accelerations behavior after PSC-TMS compared to Sham-TMS (PSC vs. Sham: -14.6,  $p = 0.075$ , generalized regression, multiple comparisons corrected). **B)** A heatmap of the brain connectivity-behavior relationship in the motor network. Each box represents the mean correlation (R) between peak accelerations behavior and a functional connection for each TMS condition. Heatmap is reported only for connections with  $R \geq 0.6$  for at least one TMS condition (indicated by an asterisk). "+" indicates connectivity-behavior relationships that are different for PSC-TMS compared to both Sham-TMS and PMC-TMS.
