# 1 **Motor network reorganization associated with rTMS-induced writing improvement** 2 **in writer's cramp dystonia**

3  
4 **Author List:** Noreen Bukhari-Parlakturk, MD, PhD<sup>\*1,2</sup>, Patrick J. Mulcahey<sup>1</sup>, Michael W.  
5 Lutz, PhD<sup>1</sup>, Rabia Ghazi, MD<sup>1</sup>, Ziping Huang<sup>1</sup>, Moritz Dannhauer, PhD<sup>3</sup>, Pichet  
6 Termsarasab, MD<sup>4</sup>, Burton Scott, MD PhD<sup>1</sup>, Zeynep B. Simsek, MD<sup>1</sup>, Skylar Groves<sup>1</sup>,  
7 Mikaela Lipp<sup>1</sup>, Michael Fei<sup>1</sup>, Tiffany K. Tran<sup>1</sup>, Eleanor Wood<sup>5</sup>, Lysianne Beynel, PhD<sup>6</sup>,  
8 Chris Petty<sup>7</sup>, James T. Voyvodic, PhD<sup>2,7</sup>, Lawrence G. Appelbaum, PhD<sup>8</sup>, Hussein R. Al-  
9 Khalidi, PhD<sup>9</sup>, Simon W. Davis, PhD<sup>1,2</sup>, Andrew M. Michael, PhD<sup>2</sup>, Angel V. Peterchev,  
10 PhD<sup>2,10,11,12,13</sup>, Nicole Calakos, MD, PhD<sup>1,2,14</sup>

11 **Affiliations:** <sup>1</sup>Department of Neurology, Duke University School of Medicine, <sup>2</sup>Duke  
12 Institute for Brain Sciences, Duke University, <sup>3</sup>Department of Computer Science, Center  
13 for Brain Stimulation, East Carolina University, Greenville, North Carolina, <sup>4</sup>Department  
14 of Medicine, Faculty of Medicine Ramathibodi Hospital, Mahidol University, Bangkok,  
15 Thailand, <sup>5</sup>Drexel University College of Medicine, Philadelphia, Pennsylvania, <sup>6</sup>Non  
16 Invasive Neuromodulation Unit, Experimental Therapeutics and Pathophysiology  
17 Branch, National Institute of Mental Health, National Institute of Health, Bethesda,  
18 Maryland, <sup>7</sup>Brain Imaging & Analysis Center, Duke University School of Medicine,  
19 <sup>8</sup>Department of Psychiatry, University of California, San Diego, California, <sup>9</sup>Department  
20 of Biostatistics and Bioinformatics, Duke University School of Medicine, <sup>10</sup>Department of  
21 Psychiatry and Behavioral Sciences, Duke University School of Medicine, <sup>11</sup>Department  
22 of Electrical and Computer Engineering, Duke University, <sup>12</sup>Department of  
23 Neurosurgery, Duke University School of Medicine, <sup>13</sup>Department of Biomedical  
24 Engineering, Duke University, <sup>14</sup>Department of Neurobiology, Duke University School of  
25 Medicine, Durham, North Carolina, USA.

## 26 27 **ABSTRACT**

28  
29 **Background:** Writer's cramp (WC) dystonia is an involuntary movement disorder with  
30 distributed abnormalities in the brain's motor network. Prior studies established the  
31 potential for repetitive transcranial magnetic stimulation (rTMS) to either premotor cortex  
32 (PMC) or primary somatosensory cortex (PSC) to modify symptoms. However, clinical  
33 effects have been modest with limited understanding of the neural mechanisms  
34 hindering therapeutic advancement of this promising approach.

35  
36 **Objective:** This study aimed to understand the motor network effects of rTMS in WC  
37 that correspond with behavioral efficacy. We hypothesized that behavioral efficacy is  
38 associated with modulation of cortical and subcortical regions of the motor network.

39  
40 **Methods:** In a double-blind, cross-over design, twelve WC participants underwent  
41 rTMS in one of three conditions (Sham-TMS, 10 Hz PSC-rTMS, 10 Hz PMC-rTMS)  
42 while engaged in a writing task to activate dystonic movements and measure writing  
43 fluency. Brain connectivity was evaluated using task-based fMRI after each TMS  
44 session.

45

46 **Results:** 10 Hz rTMS to PSC, but not PMC, significantly improved writing dysfluency.  
47 PSC-TMS also significantly weakened cortico-basal ganglia, cortico-cerebellum, and  
48 intra-cerebellum functional connectivity (FC), and strengthened striatal FC relative to  
49 Sham. Changes in PSC and SPC BOLD activity were associated with reduced dysfluent  
50 writing behavior.

51  
52 **Conclusions:** 10 Hz rTMS to PSC improved writing dysfluency by redistributing motor  
53 network connectivity and strengthening somatosensory-parietal connectivity. A key  
54 signature for effective stimulation at PSC and improvement in writing dysfluency may be  
55 strengthening of intra-cortical connectivity between primary somatosensory and superior  
56 parietal cortices. These findings offer mechanistic hypotheses to advance the  
57 therapeutic application of TMS for dystonia.

### 58 59 **Highlights**

- 60 • 10 Hz repetitive TMS to somatosensory cortex reduces writing dysfluency in dystonia
- 61 • Increased somatosensory cortex activity correlates with reduced writing dysfluency
- 62 • In dystonia + sham-TMS, writing dysfluency correlates with cerebellar connectivity.
- 63 • 10 Hz rTMS to somatosensory cortex induces reorganization of the motor network

### 64 65 **\*Corresponding author:**

66 Noreen Bukhari-Parlakturk,  
67 DUMC Box 2900, Bryan Research Building  
68 311 Research Drive  
69 Durham, NC 27710  
70 919-660-4104  
71 [noreen.bukhari@duke.edu](mailto:noreen.bukhari@duke.edu)

72  
73 Word Count: 6465

74  
75 **Key words:** writer's cramp, motor network, transcranial magnetic stimulation, dystonia

76  
77 **Running title:** Motor network reorganization improves WC.

78  
79 **Conflicts of interest:** All authors of the study report no conflicts of interest.

80  
81 **Data availability:** All data and codes are available upon reasonable request.

82  
83 **Funding sources for study:** This work was supported by grants to NBP from Dystonia  
84 Medical Research Foundation (Clinical Fellowship Training Program), Doris Duke  
85 Charitable Foundation (Fund to Retain Clinician Scientists), American Academy of  
86 Neurology (career development award) and NIH NCATS (1KL2TR002554). NBP was  
87 also supported by a career development award from the Dystonia Coalition (NS065701,  
88 TR001456, NS116025) which is part of the National Institutes of Health (NIH) Rare  
89 Disease Clinical Research Network (RDCRN), supported by the Office of Rare  
90 Diseases Research (ORDR) at the National Center for Advancing Translational Science  
91 (NCATS), and the National Institute of Neurological Diseases and Stroke (NINDS).

92 AVP's contributions were supported in part by the National Institutes of Health  
93 (R01MH128422, R01NS117405). The content is solely the responsibility of the authors  
94 and does not necessarily represent the official views of the funding agencies.  
95

96 **Personal financial interests or professional relationships related to the subject**  
97 **matter but not directly to this manuscript for the preceding 3 years:** NBP serves as  
98 a member of the DMRF Medical and Scientific Advisory Council. AVP is an inventor on  
99 patents and patent applications on transcranial magnetic stimulation technology and  
100 has received patent royalties and consulting fees from Rogue Research; equity options,  
101 scientific advisory board membership, and consulting fees from Ampa Health; equity  
102 options and consulting fees from Magnetic Tides; consulting fees from Soterix Medical;  
103 equipment loans from MagVenture; and research funding from Motif. SWD has received  
104 consulting fees from Neuronetics. PJM, MWL, RG, ZH, MD, ZBS, SG, ML, TKT, EW,  
105 LB, CP, JTV, LGA, HRA, AMM and NC report no relevant financial disclosures.  
106

107 **Any patents or copyrights licensed to the author(s) that are relevant to the work**  
108 **submitted for publication.** Please provide Patent title or number, licensee/assignee,  
109 Patent/copyright status: pending, issued, licensed, royalties.  
110

111 **Describe any other relationship or activity that may be interpreted as a conflict of**  
112 **interest by the reader. This includes serving in an editorial capacity for the**  
113 **journal to which you are submitting. When listing an item, follow with the author's**  
114 **name or initials.** AVP serves on the editorial board of Brain Stimulation journal.  
115

116 **Authors' Roles:** NBP, MWL, HRA, LGA, SWD, AVP and NC conceptualized the study.  
117 NBP, TKT, EW, LB collected study data. NBP, PJM, MWL, RG, ZH, MD, ZBS, SG, ML,  
118 MF and AMM performed data analysis. PT and BS performed clinician rating scales. CP  
119 and JV provided software codes to assist with data collection and analysis. MWL, and  
120 HRA critiqued the statistical analysis. MWL, SWD, AMM, AVP and NC critiqued the data  
121 analysis. NBP and NC wrote the manuscript. All co-authors reviewed and edited the  
122 manuscript.  
123

## 124 **1. Introduction**

125 Writer's cramp (WC) dystonia is a task-specific focal hand dystonia presenting with  
126 involuntary muscle contractions involving the hand and arm muscles during the specific  
127 task of writing (simple WC) and other fine motor tasks (complex WC) (1). Patients  
128 manifest with abnormal, often repetitive, movements and postures of the hand and arm  
129 that can be painful and functionally disabling (2). There are no disease-modifying  
130 therapies for dystonia, and current treatments provide symptomatic benefit that is short-  
131 lived and variable.

132 Repetitive transcranial magnetic stimulation (rTMS) is a noninvasive brain stimulation  
133 technology that in a meta-analysis of 27 prior studies showed some benefit in reducing  
134 dystonia symptoms (3). Across these studies, a predictor of benefit was the stimulation  
135 site which varied by the dystonia subtype. In dystonias outside of the upper limb, such  
136 as cervical dystonia and blepharospasm, some behavioral benefits were reported after  
137 TMS to cerebellum (2/6) and anterior cingulate cortex (3/3) respectively. In upper limb  
138 dystonia, behavioral benefit was reported after TMS to motor-premotor cortex (PMC)  
139 (9/18 studies) or primary somatosensory cortex (PSC) (1/18 studies) (3-5). Although  
140 PSC only showed benefit in one study, it is noteworthy that the reported behavioral  
141 benefit was more enduring (two to three weeks) than any of the nine PMC studies (3-5).  
142 To best resolve whether one target site is superior, a head-to-head comparison of PMC  
143 versus PSC target controlling for the other variables among these studies would be  
144 necessary.

145 In addition to the stimulation site, another predictor of TMS benefit was the stimulation  
146 parameters. In upper limb dystonia, behavioral benefit was reported after 1 Hz rTMS  
147 (6/18 studies), 0.2 Hz rTMS (1/18 studies) and continuous theta burst (TBS) TMS (2/18  
148 studies) while in cervical dystonia and blepharospasm, only TBS-TMS (2/5 studies) and  
149 0.2 Hz rTMS (3/3 studies) showed benefits respectively (3). Overall, some behavioral  
150 benefit was reported after TMS in adult focal dystonias but varied by dystonia subtypes  
151 with key factors being stimulation site and stimulation parameters.

152 To improve the clinical efficacy of TMS in dystonia, more clinical studies are needed to  
153 directly compare the previously effective stimulation sites and parameters within  
154 subject. In addition, advances in our understanding of the brain mechanism mediating  
155 TMS benefit irrespective of brain disorder is critical to enable future rational optimization  
156 of this promising non-invasive therapeutic modality. In Parkinson's disease, for  
157 example, 10 Hz rTMS to the motor cortex was shown to increase dopamine release  
158 from the basal ganglia (4). This study is relevant to dystonia because it demonstrated  
159 that 10 Hz rTMS to the motor cortex could modulate subcortical circuitry that is  
160 implicated in dystonia as well. In Wilson's disease, the same 10 Hz rTMS protocol to the  
161 motor cortex improved upper limb dystonia suggesting that 10 Hz rTMS to the motor  
162 cortex could improve clinical symptoms of upper limb dystonia (5). Taken together,  
163 these two studies motivate further exploration of the potential for this frequency in other  
164 dystonias. No study to date has tested the role of 10 Hz rTMS in individuals with adult  
165 focal dystonias. Collectively, comparative and mechanistic TMS studies are critically  
166 needed to guide further refinements in TMS protocols to achieve clinically meaningful  
167 and enduring benefits across multiple dystonia subtypes.

168 In addition to the stimulation site and parameters, an individual's brain state can be a  
169 critical predictor of TMS benefit -a concept referred to as target engagement (5). For  
170 instance, in obsessive-compulsive disorder, TMS studies often use cue-triggered  
171 symptom provocation to optimize the brain state for engaging the fear-memory  
172 reconsolidation network (6). Along these lines, in WC dystonia, a writing task may be  
173 useful to prime the writing motor network of the brain implicated in focal hand dystonia.

174 Here, we aimed to build on prior TMS studies by directly comparing two stimulation sites  
175 that have reported efficacy in WC dystonia. We further aimed to understand the  
176 relationships between TMS-induced behavioral changes and brain activity by  
177 performing functional MRI. The primary hypothesis was that the stimulation site that will  
178 show symptom benefit after TMS will modify key subcortical brain regions known to play  
179 a role in the dysfunctional motor network of dystonia. In a double-blind, cross-over study  
180 design, a 10 Hz rTMS was applied to both PMC and PSC, and compared to Sham  
181 rTMS over the course of three independent sessions, allowing for a reliable within-  
182 subject comparison of stimulation site efficacy with several critical parameters being  
183 held constant.

## 184 **2. Materials and methods:**

185 **2.1 Study design:** The study was a double-blind sham-controlled cross-over design  
186 with data collected at Duke University Hospital between September 2018 and  
187 September 2022. The study was approved by the Duke Health Institutional Review  
188 Board (IRB # 0094131), registered on clinicaltrials.gov (NCT 06422104) and performed  
189 in accordance with the Declaration of Helsinki. All participants gave written informed  
190 consent prior to any study participation. Inclusion criteria were adults (> 18 years),  
191 diagnosed with isolated right-hand dystonia by a Movement Disorder Specialist, more  
192 than three months from the last botulinum toxin injection, more than one month from  
193 trihexyphenidyl medication, and able to sign an informed consent form. Exclusion  
194 criteria were any contraindications to receiving MRI or TMS.

195 **2.2 MRI data acquisition and preprocessing:** All study participants completed a brain  
196 imaging scan pre-TMS and those who consented to TMS also completed it after each  
197 TMS visit. All anatomical and functional imaging data was collected on a 3 Tesla GE  
198 scanner equipped with an 8-channel head coil. The anatomical MRI scan was acquired  
199 using T1-weighted echo-planar sequence with the following parameters: voxel size: 256  
200 x 256 matrix, repetition time (TR) = 7.316 ms, echo time (TE) = 3.036 ms, field of view  
201 (FOV) = 25.6 mm, 1 mm slice thickness. During fMRI sequences, participants copied  
202 holo-alphabetic sentences on an MRI-compatible writing tablet. The sentence writing  
203 was performed in a block design alternated by rest blocks (**Fig. 1, task-fMRI panels**).  
204 The CIGAL software presented visual writing instructions and recorded participants'  
205 movements during the fMRI scan (7). Pre-TMS fMRI: Functional echo-planar images  
206 were acquired using the following parameters: voxel size: 3.5 x 3.5 x 4.0mm<sup>3</sup>, flip angle  
207 90°, TR = 2 s, TE = 30 ms, FOV = 22 mm for 37 interleaved slices in ascending order,  
208 writing block: 20 s, rest block: 16 s, total: 12 blocks per fMRI. Post-TMS fMRI:  
209 Functional echo-planar images were acquired with the following parameters: voxel size:  
210 2.0 x 2.0 x 3.0mm<sup>3</sup>, flip angle 90°, TR = 2.826 s, TE = 25 ms, FOV = 25.6 mm for 46



211 slices. Writing block: 20 s, rest block: 20 s, total: 5 blocks x 6 runs = 30 blocks per fMRI.  
212 fMRI images were preprocessed using fMRIPrep (8) as detailed in the supplementary  
213 methods. FMRI with excessive head movements (defined as mean frame-wise  
214 displacement > 0.5 mm) were excluded from the study.  
215

216 **2.3 MRI signal analysis:** Pre-processed pre-TMS fMRIs from were input into FEAT  
217 analysis in FSL software version 6.0 (FMRIB, Oxford, UK) to generate a subject level  
218 statistical map. A general linear model in which writing task timing (block design) was  
219 convolved with a double-gamma hemodynamic response function to generate the  
220 statistical brain map. To account for head motions, fMRIPrep reported regressors (CSF,  
221 white matter, framewise displacement, and motion outliers) were regressed out from  
222 each statistical map. Spatial smoothing with a Gaussian kernel of full-width half-  
223 maximum of 5 mm and temporal high pass filter cutoff of 100 seconds was applied  
224 during the FEAT analysis. A participant's statistical brain map representing the brain  
225 (BOLD) activity during the writing task relative to rest on fMRI was then generated and  
226 used for TMS targeting. A WC group-level statistical map for the writing-based task-  
227 fMRI was also computed by importing all WC participants' statistical brain maps from  
228 their baseline task-fMRI into a mixed-effects FLAME1 model.  
229

230 **2.4 Personalized TMS target selection:** For each TMS study participant, a two-voxel  
231 cortical brain mask was generated for TMS targeting to premotor and primary motor  
232 cortices (PMC), and for TMS targeting to primary somatosensory cortex (PSC). To  
233 constrain the stimulation target to the PMC and PSC regions, each participant's  
234 statistical brain map was overlaid on the WC group statistical brain map, and  
235 anatomical masks for precentral (for PMC) and postcentral gyrus (for PSC) from the  
236 Harvard-Oxford MNI atlas and the participant's anatomical scan. Two consecutive  
237 voxels in the anatomic region of left PMC and PSC, with peak activation in the WC  
238 participant, and the WC group statistical brain maps and within 1 cm from the scalp  
239 surface were selected as the fMRI-guided PMC and PSC target for TMS delivery (**Fig.**  
240 **1, target selection panel, red sphere represents PSC target**). The fMRI guided  
241 cortical brain masks were then used to perform prospective electric field (E-field)  
242 modeling on each participant's scalp as detailed in the supplementary methods. The  
243 purpose of the modeling was to identify the TMS coil position and orientation on the  
244 participant's scalp that would maximize the directional E-field in the cortical target of  
245 interest perpendicular to the closest gyral wall. This optimal coil setup was then used  
246 online with the patient's T1 to localize and visualize the TMS target in the  
247 neuronavigation system (Brainsight, Rogue Research, Canada, version 2.4.9). The final  
248 personalized TMS targets at left PMC and left PSC for the 12 WC participants are  
249 shown overlaid on the MNI brain (**Fig. 2**).

250 **2.5 TMS stimulation:** Eligible participants received three TMS visits. The three TMS  
251 visits consisted of 10 Hz rTMS to PSC, 10 Hz rTMS to PMC, and Sham rTMS to PMC  
252 (**Fig. 1, rTMS panel**). Each rTMS visit was separated by a minimum of one week to  
253 allow signal washout. To negate any order effect, each participant was randomized to  
254 one of six possible orders for the three TMS conditions. All TMS was performed using  
255 an A/P Cool B65 coil attached to a MagVenture R30 device (MagVenture, Farum,  
256 Denmark). During each TMS visit, participants first completed an optimal motor cortex

257 localization and motor threshold calculation as detailed in the supplementary methods  
258 (9). The active TMS paradigm delivered to each cortical target was 25 trains applied at  
259 10 Hz rTMS with biphasic pulses and an inter-train interval of 10 seconds at 90%  
260 resting motor threshold (RMT) for a total of 1000 pulses delivered in a single block  
261 (~five minutes), while participants were in sitting in a recliner. To prime the motor  
262 network implicated in focal hand dystonia and circumvent concerns that delivering TMS  
263 concurrently during a writing task would compromise stimulation accuracy, an  
264 interleaved approach of writing task and brain stimulation was designed. Specifically,  
265 each stimulation block was preceded by a writing block (~five minutes) in which  
266 participants performed a sentence copying task. A total of four blocks of TMS alternated  
267 with four writing blocks were performed (total 4000 pulses per TMS visit) (**Fig. 1, rTMS**  
268 **panel**). To perform sham stimulation, the same AP coil was used in placebo mode,  
269 which produced clicking sounds and somatosensory sensation from scalp electrodes  
270 similar to the active mode but without a significant electric field induced in the brain (10).  
271 As previously reported, this type of stimulation allows participants to stay blinded during  
272 the experiment.

273 **2.6 Retrospective TMS coil deviations:** During each TMS block, data on the  
274 experimental TMS coil location and orientation was recorded every 500 ms in the  
275 neuronavigation system and snapped to scalp reconstruction mode prior to exporting it.  
276 Data was then imported into SimNIBS software (version 2.0.1 / 3.2.6) to calculate the  
277 deviations from the intended TMS coil position and orientation using the retrospective  
278 Targeting and Analysis Pipeline (TAP) (11). The TMS coil placement (position and  
279 orientation) data were first extruded outwards along the scalp normal by adjusting it for  
280 the participant's recorded hair thickness for each TMS visit. These TMS coil placement  
281 data were then used to compute the coil placement deviation from the optimized coil  
282 setup constructed during the prospective E-field modeling reported in the  
283 supplementary methods. The deviations in the TMS coil placement were calculated in  
284 the normal and tangential planes and reported as changes in distance (mm) and angle  
285 (degrees). The direct distance between the actual and optimized target was also  
286 calculated, as previously reported (11, 12). Due to technical issues with the  
287 neuronavigation software, the experimental TMS coil location and orientation during one  
288 TMS block was excluded from one participant's sham-TMS visit.

289 **2.7 TMS induced behavior changes:** During each TMS visit, participants performed a  
290 behavioral writing assay before and after each four-block TMS session (**Fig. 1,**  
291 **behavior assessment panels**). The behavioral assay consisted of participants using a  
292 sensor-based pen on a digital tablet (MobileStudio Pro13; Wacom Co, Ltd, Kazo,  
293 Japan). Participants copied a holo-alphabetic sentence ten times in a writing software  
294 (MovAlyzer, Tempe, AZ, USA). The sensor-based pen recorded the x, y, and z positions  
295 and the time function of the participants' writings. The writing software then transformed  
296 the writing samples' position parameters and time functions using a Fast Fourier  
297 transform algorithm to calculate the kinematic features automatically. A previously  
298 detailed analysis of these kinematic writing measures showed that the sum of  
299 acceleration peaks in a single sentence (henceforth peak accelerations) (**Fig. 1,**  
300 **behavior assessment panel, black circles**) demonstrated high diagnostic potential  
301 (sensitivity, specificity, and intra-participant reliability), and associated with patient

302 reported dystonia and disability scales (13). In this study, the peak accelerations  
303 measure was used as the primary behavioral outcome measure. Participants performed  
304 the behavioral assessment before and after each TMS session. To minimize learning  
305 across the three TMS visits, a different holo-alphabetic sentence was used for each  
306 sequential visit. The three sentences were: Pack my box with five dozen liquor jugs; The  
307 quick brown fox jumps over the lazy dog; Jinxed wizards pluck blue ivy from the big  
308 quilt. To measure the change in peak acceleration, each participant's post-TMS  
309 measure was normalized by the mean of their pre-TMS measure using the following  
310 equation: [(Post-TMS peak accelerations per sentence)/(mean peak accelerations for all  
311 ten sentences pre-TMS)]\*100. Higher measures of peak accelerations represent greater  
312 writing dysfluency and worsening dystonia. The standard TMS adverse events survey  
313 and secondary outcome measures of clinician-rated and participant-reported dystonia  
314 scales were also collected before and after each TMS session as detailed in the  
315 supplementary methods.

316 **2.8 TMS induced fMRI changes:** After each TMS visit, participants completed a task-  
317 based fMRI. The fMRI task design, acquisition settings, preprocessing and run level  
318 analyses are detailed in methods section 2.2 and 2.3 above. To compare changes in  
319 BOLD activity across the three TMS conditions, 4D timeseries data were extracted from  
320 each fMRI run level FEAT directory using brain masks for regions of interests. The  
321 timeseries data for each region of interest was z-scored across runs and analyzed as  
322 on-block and off-block writing epochs. To perform functional connectivity analysis, the  
323 extracted 4D time series data for each region of interest was correlated pairwise using  
324 Pearson's correlation (R) and Fisher z-transformed.

325  
326 **2.9 Brain parcellation and ROI extraction:** To compare BOLD activity and functional  
327 connectivity analysis across TMS conditions, brain masks corresponding to regions of  
328 the motor network previously identified as abnormal in the writing motor circuit of WC  
329 dystonia were used in this study. Specifically, an ROI was included if it was reported in  
330 at least two of these five isolated sporadic dystonia studies (14-18). Anatomical brain  
331 masks were prepared using the Harvard-Oxford MNI brain atlas for the following  
332 subcortical regions: left caudate (CAU), left putamen (PUT), left globus pallidus (PAL),  
333 left thalamus (THL), left subthalamic nucleus (STN) and left substantia nigra (SN). Since  
334 cortex and cerebellum are large brain regions, brain masks for these regions were  
335 made using the publicly available Dictionaries of Functional Modes (DiFuMo) brain atlas  
336 (19). DiFuMo is a fine grain atlas that parcellated the brain into functional regions of  
337 1024 components, based on data from 15,000 statistical brain maps spanning 27  
338 studies (19). To select DiFuMo brain masks for left superior parietal cortex (SPC), left  
339 inferior parietal cortex (IPC), left supplementary motor area (SMA) and right cerebellar  
340 lobules VI and VIII (CBL), MNI coordinates from prior neuroimaging studies in dystonia  
341 were used (14). For PSC and PMC, each participant's personalized TMS target (section  
342 2.4) was used as the center to prepare a custom 5 mm spherical mask.

343  
344 **2.9 Statistical Analyses:** Because the study was a cross-over design with multiple  
345 visits and measures, a Mixed-effects Model for Repeated Measures (MEMRM)  
346 statistical analysis was used to compare differences in data within participants across  
347 the three TMS conditions. For the measure of TMS coil deviations, the MEMRM



348 covariate was TMS condition and since all p-values >0.05, no multiple comparison  
349 correction was performed. For the clinician rating scales, the covariates were TMS  
350 condition, TMS visit, and clinician rater. For patient rating scales, the covariates were  
351 TMS condition, and TMS visit. Since all p-values >0.05, no multiple comparison  
352 correction was performed. For the measure of peak accelerations behavior, the  
353 covariates for MEMRM were TMS condition, visit, and interaction of TMS condition\*visit.  
354 Differences across participants for each data set were accounted for by including  
355 participant as a random effect variable. Behavior data was adjusted for multiple  
356 comparison using Tukey-Holm-Sidak correction (20) with p<0.05 considered significant.  
357 For BOLD activity analysis, BOLD activity from 13 brain regions (PMC, PSC, SPC, IPC,  
358 SMA, CAU, PUT, PAL, THL, STN, SN, CBL VI, CBL VIII) labeled as motor network  
359 were extracted and statistically analyzed using MEMRM. Changes in BOLD activity  
360 during the on-block and off-block of writing were analyzed separately. The dependent  
361 variable was BOLD activity for each region. The covariates were TMS condition, visit  
362 and interaction of TMS condition\*visit. BOLD activity analysis was corrected for 60  
363 MEMRM tests using the FDR correction method of Benjamini-Hochberg (21) and  
364 p<0.05 considered significant. For functional connectivity, the 13 brain regions were  
365 correlated pairwise across the motor network. To focus on clinically meaningful  
366 differences induced by TMS, functional connectivities (FC) that showed at least more  
367 than minimal effect sizes (defined as Cohen's  $D \geq |0.2|$ ) between active and sham  
368 conditions were analyzed using MEMRM test with a setup similar to BOLD activity  
369 analysis. FC data were FDR corrected for 126 FC tests for PSC vs. Sham and 166 FC  
370 tests for PMC vs. Sham with p <0.05 considered significant. To perform BOLD activity-  
371 behavior correlations within participant, BOLD activity from brain regions reported in  
372 Table 1 were correlated within participant with their measure of normalized peak  
373 accelerations behavior using Pearson's (R). BOLD activity-behavior correlations (R)  
374 greater than or equal to 0.6 for at least one TMS condition were presented. An  
375 exploratory posthoc analysis was also performed to compare differences in FC-behavior  
376 correlation across the three TMS conditions. FC-behavior relationships in the motor  
377 network with R-value greater than or equal to  $|0.6|$  for at least one TMS condition were  
378 identified and presented in a heatmap (Figure 9B). Using the correlations in Figure 9B,  
379 a subset analysis was performed to statistically compare the FC-peak accelerations  
380 correlations that differentiated the effective PSC stimulation site from the non-effective  
381 PMC and sham conditions. To evaluate for statistical differences, a generalized linear  
382 regression analysis (22) was performed for each FC-behavior relationship that  
383 differentiated PSC-TMS from the other two conditions. The dependent variable was  
384 peak accelerations behavior, the covariates were FC, TMS condition, and interaction  
385 term (FC\*TMS condition). P-values for the interaction term for PSC-TMS (PSC-TMS  
386 condition\*FC) across the selected FCs were corrected for multiple comparisons using  
387 the Benjamini-Hochberg method(21) with p<0.1 considered significant.

## 388 389 **RESULTS:**

390 **Clinical characteristics:** Thirty-four participants were assessed for study eligibility  
391 (Fig. 3). Of those assessed for eligibility, 24 WC participants met the inclusion/exclusion  
392 criteria to participate in the TMS study and completed a baseline fMRI before the first  
393 stimulation visit. The baseline fMRI from five participants were excluded due to other

394 neurological disorder, structural abnormalities on MRI brain or excess head motion.  
395 fMRIs from 19 WC participants were then used to identify a group targeting approach  
396 for TMS. Of these 19 participants, 14 consented to participate in the TMS research  
397 visits. Two participants who consented to TMS visits were taking a medication that  
398 increased the risk of seizures and, therefore, were excluded from undergoing TMS.  
399 Twelve WC participants (11/1 males/female; mean age 55 [SD 12.91] years) completed  
400 all three TMS visits. Due to technical issues during data collection, one participant's  
401 TMS visit (Sham) was removed from data analysis. Thus, data from 12 WC participants  
402 and 35 TMS visits (12 participants x 3 conditions – 1 visit = 35) were used for all  
403 analyses in this study. None of the 12 WC participants reported any TMS adverse side  
404 effects. The mean symptom duration for the 12 WC participants was 16.4 years [SD  
405 15.54].

406 **No differences in TMS technical delivery:** To evaluate the technical delivery of TMS,  
407 the position and orientation of the TMS coil during the three conditions were analyzed  
408 retrospectively. There were no significant differences in the position or orientation of the  
409 TMS coil across the three conditions (**Supplementary Figure 1 and Supplementary**  
410 **Table 1**). Therefore, TMS delivery across the three conditions was technically  
411 comparable.

412 **10 Hz rTMS to PSC, but not PMC, improved writing dysfluency:** In a within-  
413 participant comparative design, in which all participants received stimulation to both  
414 sites and at the same frequency, we found that 10 Hz rTMS to PSC significantly  
415 decreased writing dysfluency compared to Sham-TMS (**Fig. 5A**) [PSC: mean 96.43, SE  
416 1.39; Sham: mean 100.06, SE 0.76; PSC vs. Sham: -1.73, SE: 0.41,  $t(21)$ : -4.22,  $p =$   
417 0.001] and PMC-TMS [PMC: mean 99.00, SE 0.90; PSC vs. PMC: -1.28, SE 0.40,  $t(21)$ :  
418 3.23,  $p = 0.012$ ]. TMS to PMC did not show significant differences in writing dysfluency  
419 compared to Sham [PMC vs. Sham: -0.45, SE 0.41,  $t(21)$ : -1.09,  $p = 0.639$ ]. These  
420 results confirm prior studies that TMS can modify behavior in WC dystonia and show  
421 the first results using 10 Hz frequency, within-participant site comparisons, and delivery  
422 under a task-primed brain state. Across the clinician rating (BFM right arm dystonia, and  
423 WCRS movement score) and participant reported scales (BFM writing score, and  
424 ADDS), there were small but consistent improvements in dystonia symptoms after PSC-  
425 TMS compared to Sham (**Figure 5B-E, Supplementary Table 2**), “Difference” column,  
426 positive values represent improvement, and negative values represent worsening  
427 dystonia). However, the effect sizes of these categorical rating scales were small with  
428 large variability resulting in no statistical differences across the three TMS conditions.

429 **10 Hz rTMS to either PMC or PSC decreased subcortical activity in the motor**  
430 **network compared to sham-TMS.** Considering the differential effect of the stimulation  
431 site on behavioral outcomes, we examined how active TMS at these two target sites  
432 affected brain BOLD activity during a writing task relative to both rest and sham-TMS  
433 condition (**Fig. 6A**). Across the motor network, active stimulation at either of the two  
434 TMS target sites showed similar patterns of brain activation during the writing task  
435 compared to sham-TMS (**Fig. 6B**). Specifically, 10 Hz rTMS decreased subcortical brain  
436 activity and increased BOLD activity at the superior parietal cortex during writing  
437 compared to sham-TMS. In the cerebellum, the brain activation pattern during writing

438 varied by the active TMS target site. Active PMC-TMS decreased BOLD activity in  
439 lobules VI and VIII while active PSC-TMS decreased BOLD activity in lobule VI only  
440 during writing compared to sham-TMS. Overall, these results suggest that cortically  
441 delivered 10 Hz rTMS decreased deep brain activity in the motor network compared to  
442 sham-TMS with an overall activation pattern during writing that was similar across the  
443 two stimulation sites. Changes in BOLD activity after 10 Hz rTMS, therefore, do not fully  
444 explain the differential effect of stimulation site on behavioral outcomes.

445 **PSC-TMS modified subcortical connectivity, distinct from PMC-TMS and sham-**  
446 **TMS.** We next considered if the behavioral outcome differences between the stimulation  
447 sites also corresponded to changes in functional connectivity (FC) after TMS. **Figure 7**  
448 illustrates the FC changes induced by PSC-TMS compared to sham-TMS. In general,  
449 PSC-TMS weakened cortico-striatal FC compared to sham-TMS (thin lines: PMC-CAU,  
450 PSC-CAU), cortico-cerebellar FC (SPC-CBLVI), and intra-cerebellar FC (CBL VI-VIII).  
451 PSC-TMS also strengthened striato-cerebellar FC (thick lines: PAL-CBL-VI) and striato-  
452 nigral FC (PUT-SN) compared to sham-TMS (**Table 1**). There were no FCs that showed  
453 significant differences between PMC-TMS compared to sham-TMS. Overall, these  
454 findings demonstrate two important points. 10 Hz rTMS to PSC interleaved with writing  
455 task predominantly changed subcortical FC compared to sham-TMS. Second, changes  
456 in FC induced by TMS may explain the differential effect of stimulation site on  
457 behavioral outcomes.

458 **TMS-induced changes in PSC and SPC BOLD activity were associated with**  
459 **reduction in writing dysfluency.** We next asked if there was a relationship between  
460 TMS-induced brain activation and behavior changes and if this relationship was  
461 dependent on the stimulation site. A BOLD activity-behavior correlational analysis was  
462 performed for all brain regions in **Table 1** that showed significant differences in  
463 functional connectivity between PSC-TMS and sham-TMS. Among these brain regions,  
464 PSC and SPC BOLD activity correlated with behavior of peak accelerations.  
465 Specifically, increase in PSC BOLD activity after PSC-TMS was associated with  
466 reduction of peak accelerations behavior in WC participants ( $R = -0.84$ ,  $p = 0.02$ ) (**Fig.**  
467 **8**). In contrast, there were no correlations observed between PSC BOLD activity and  
468 behavior after PMC-TMS ( $R = -0.39$ ,  $p = 0.75$ ) or sham-TMS ( $R = 0.15$ ,  $p = 0.76$ ). In  
469 contrast, increase in SPC BOLD activity correlated with increase in peak accelerations  
470 behavior after Sham-TMS in WC participants ( $R = 0.74$ ,  $p = 0.01$ ). This SPC BOLD-  
471 behavior correlation was not observed after PMC-TMS ( $R = -0.19$ ,  $p = 0.55$ ) or PSC-  
472 TMS ( $R = -0.15$ ,  $p = 0.64$ ). Collectively, these results suggest that TMS induced  
473 changes in the association between brain activity and behavioral measures were  
474 dependent on the stimulation site and TMS induced activation of PSC and SPC after  
475 PSC-TMS were associated with reduction in writing dysfluency.

476 **PSC-TMS induced reorganization of motor network connectivity was associated**  
477 **with reduced writing dysfluency.** Lastly, in a post-hoc analysis, we explored if there  
478 was an association between TMS-induced changes in functional connectivity in the  
479 motor network and TMS-induced changes in behavior and if this association was  
480 dependent on the stimulation site. From this analysis, we made three observations (**Fig.**  
481 **9**). First, under Sham-TMS condition (control condition), nine significant FC

482 relationships with writing dysfluency were identified with majority of them in connection  
483 to the cerebellum (cortico-cerebellum, subcortical-cerebellum, intra-cerebellum).  
484 Second, compared to sham, correlations between writing dysfluency and FC involving  
485 the cerebellum were no longer present following 10 Hz rTMS to either PMC or PSC.  
486 The loss of FC-behavior correlations in these regions was observed to a greater extent  
487 after PSC-TMS than PMC-TMS. Third, using the FC-peak accelerations correlations in  
488 Fig. 9B, a subset analysis was performed to statistically compare the FC-peak  
489 accelerations relationships that differentiated the effective PSC stimulation site from the  
490 non-effective PMC and sham conditions. PSC-TMS differed from the other two  
491 stimulation sites in four FC-behavior correlations (PSC-SPC, CAU-SN, PUT-PAL, PUT-  
492 SN) that spanned cortical and subcortical brain regions (**Fig. 9B, indicated by “+”**  
493 **sign**). Of these four correlations, PSC-TMS significantly differed from sham-TMS in the  
494 PSC-SPC FC-behavior association (PSC vs. Sham: -14.6,  $p = 0.075$ , generalized linear  
495 regression, Benjamini-Hochberg adjustment for multiplicity) (**Fig. 9A**). Collectively,  
496 these results demonstrated that reduced writing dysfluency after PSC-TMS may be  
497 mediated by loss of functional connectivity-behavior associations to the cerebellum,  
498 and/or gain of functional connectivity-behavior associations to cortical and subcortical  
499 brain regions. Furthermore, the association between writing dysfluency and intracortical  
500 connectivity (PSC-SPC) may be a key signature for PSC-TMS induced brain-behavior  
501 changes.

502  
503 Overall, TMS target comparison demonstrated that 10 Hz rTMS to primary  
504 somatosensory cortex but not premotor cortex significantly changed functional  
505 connectivity and markedly redistributed functional connectivity-behavior associations  
506 that spanned cortical and subcortical regions of the motor network.

## 507 508 **DISCUSSION**

509 The present study compared the efficacy of two TMS cortical sites in reducing dystonic  
510 behavior, each previously shown to be beneficial in separate dystonia studies, and  
511 aimed to identify a TMS-induced brain mechanism underlying the observed behavioral  
512 improvement. We report three key findings. First, 10 Hz rTMS to primary  
513 somatosensory cortex significantly reduced writing dysfluency compared to Sham and  
514 to 10 Hz rTMS at the premotor cortex. These results suggest the clinical potential of 10  
515 Hz rTMS to the PSC for this rare brain disorder. Second, we identified that TMS to the  
516 same region may have improved behavior by changing subcortical connectivity in the  
517 motor network. Third, we demonstrate that the intra-cortical connectivity between  
518 primary somatosensory and superior parietal cortices are a key predictor for effective  
519 stimulation at PSC. Collectively, the present study findings will guide future refinements  
520 in TMS protocols to achieve clinically meaningful and enduring benefits in this rare brain  
521 disorder.

522 Our first principal study finding was that 10 Hz rTMS to PSC significantly reduced  
523 writing dysfluency in WC dystonia. The twenty-minute PSC-TMS session showed an  
524 effect size of 0.96 compared to Sham. This effect size is among the highest reported for  
525 TMS studies in dystonia. The kinematic writing metric was selected based on its high  
526 diagnostic performance in a prior exploratory study comparing 22 kinematic writing



527 measures from writer's cramp and healthy volunteers (13). In that study, across the 22  
528 kinematic measures, peak accelerations showed high sensitivity, specificity, intra-  
529 subject reliability, and realistic sample size to power a clinical trial. Importantly, WC  
530 participants' baseline measure of peak accelerations also significantly correlated with  
531 the clinical scores of BFM right arm dystonia and disability. In this study, we wish to  
532 highlight that three of the four clinical scores showed trends of greater improvement  
533 after PSC vs. Sham than PMC vs. Sham (Supplementary Table 2, Difference column).  
534 The lack of statistical differences in clinical scores may reflect lower sensitivity of these  
535 categorical scores to detect motor changes highlighting the importance of using  
536 kinematic measures in addition to rating scales in a clinical trial.

537  
538 Since the cortical gyri for PSC and PMC lie adjacent to the central sulcus, the  
539 differential stimulation response to these regions also demonstrated the cortical  
540 selectivity of our TMS effect. It is interesting that prior (9/18) studies reported a  
541 behavioral benefit after PMC-TMS (3). The majority of these studies, however,  
542 delivered 1 Hz rTMS to PMC. Therefore, the finding that PSC is a more effective  
543 stimulation site than PMC may vary by stimulation frequency. Specifically, this study  
544 showed that PSC may be more effective than PMC using 10 Hz rTMS frequency.  
545 Future studies are needed to test if PMC or PSC may be more effective using 1 Hz  
546 rTMS frequency. Additionally, the brain state during TMS delivery may also affect the  
547 stimulation site efficacy. In this study, TMS was interleaved with writing task to prime the  
548 motor network during brain stimulation while in prior studies, TMS was interleaved with  
549 periods of rest. Since the brain state during stimulation delivery can change the  
550 plasticity inducing mechanism (long term potentiation vs. long term depression) (23), the  
551 stimulation at rest in prior studies may have induced a plasticity mechanism that may be  
552 different than the present study. Overall, our study expands the range of effective TMS  
553 parameters for adult focal hand dystonia and raises the possibility that efficacy of  
554 stimulation site may be a function of the stimulation frequency and brain state during  
555 TMS delivery.

556 Our second principal finding was that 10 Hz rTMS to PSC induced significant changes  
557 in subcortical connectivity in the motor network. This was an important study question to  
558 guide future refinements in therapeutic applications of TMS in dystonia, where  
559 subcortical regions such as basal ganglia and cerebellum play key roles. It is unknown  
560 whether active TMS improves behavior by weakening or strengthening brain  
561 connections. Our study showed that both weakening and strengthening of connections  
562 are present resulting in TMS-induced re-organization of the motor network. This is  
563 consistent with a prior study that applied a single session of 1 Hz rTMS to PMC and  
564 showed modification of cortical and subcortical brain regions on PET scan of primary  
565 focal dystonia participants (24). The strong association between stimulation site (PSC  
566 BOLD activity) and writing dysfluency behavior (Fig. 8) further support the potential  
567 mechanism that TMS to PSC reduces writing dysfluency behavior. Overall, the present  
568 study adds important insights on the TMS induced brain mechanism that contribute to  
569 motor behavior benefit in dystonia.

570 Another study finding was that the behavioral benefit after PSC-TMS was associated  
571 with strengthening of intra-cortical connectivity between somatosensory cortex and

572 superior parietal cortex. This is consistent with a prior TMS study which showed that 1  
573 Hz rTMS to the primary somatosensory cortex also activated the superior parietal cortex  
574 in WC dystonia (25). The superior parietal cortex is critically important for  
575 somatosensory discrimination by providing a mental model of the extremity function  
576 (26). Strengthening of the somatosensory to parietal connectivity may, therefore, be a  
577 key mechanism for developing a more accurate mental model of the hand-arm function,  
578 which in turn may improve fine motor control and reduce dysfluent writing behavior.  
579 Impairment of connectivity between the parietal cortex and somatosensory cortex were  
580 previously described in resting-state fMRIs of WC dystonia, and in multimodal imaging  
581 analyses of isolated task-specific focal dystonias (WC, musician's dystonia, and  
582 spasmodic dysphonia) (27, 28). Impaired activation of superior parietal cortex has also  
583 been reported in cervical dystonia (29, 30). Furthermore, a prior WC study delivered a  
584 single session of cTBS to the inferior parietal lobule and showed that connectivity  
585 between the inferior parietal lobule and premotor cortex was normalized in WC  
586 compared to healthy brains (31). Collectively, prior observational and interventional  
587 studies support our study finding that the connectivity between the parietal and  
588 sensorimotor cortex may be a key target for clinical therapy in WC dystonia. Future  
589 studies should, therefore, compare the efficacy of TMS to parietal cortex, premotor  
590 cortex and primary somatosensory cortex to determine if the activation of the parietal  
591 cortex may be a more effective target for improving somatosensory dysfunction in  
592 dystonias.

593 To our knowledge, this is the first interventional study to identify relationships between  
594 brain connectivity and dystonic behavior in the sham-TMS condition to inform the  
595 pathophysiology. A prior study using, a systematic review of lesion induced dystonia  
596 across 359 published cases, identified that focal upper limb dystonia was most  
597 commonly caused by lesions in the basal ganglia and thalamus (32). The present study  
598 also supports these findings by demonstrating that three of the four brain-behavior  
599 connections that differentiate the effective stimulation site of PSC from noneffective  
600 stimulation sites of PMC and sham conditions are connections to or within the basal  
601 ganglia regions (caudate-substantia nigra, putamen-pallidum, putamen-substantia  
602 nigra). More importantly, the present study demonstrates that the brain connectivity  
603 pattern of subregions of the motor network are responsive to change in a direction that  
604 improves behavior after PSC-TMS compared to sham-TMS. With further validation, this  
605 brain connectivity to behavior patterns might be developed into a screening tool for  
606 future interventional trials in dystonia.

607 An important mechanistic question raised by these findings are whether the functional  
608 connectivity changes induced by 10 Hz PSC-TMS in the WC cohort represent a  
609 "correction" toward healthy brain connectivity pattern or a deviation from the  
610 connectivity observed in healthy individuals. While this study was not designed to  
611 assess the effects of PSC-TMS in healthy participants, a future study comparing the  
612 connectivity changes induced by 10 Hz PSC-TMS in healthy and WC subjects could  
613 differentiate between connectivity changes specific to WC pathophysiology from those  
614 that are general effects of PSC-TMS.

615 The brain-behavior relationships identified in this study also provide greater insight into  
616 the cerebellum's role in dystonia. Prior neuroimaging studies observed that greater  
617 disease duration in WC participants correlated with negative cortico-cerebellar  
618 connectivity (15). Our study also identified cortico-cerebellar circuitry as potentially  
619 clinically relevant. WC participants after sham-TMS showed direct correlation between  
620 cortico-cerebellar connectivity and writing dysfluency, a relationship that was absent  
621 after PSC-TMS. Our results further support a causal role of this circuitry because TMS  
622 to PSC leads to less writing dysfluency and a significant loss of correlation between  
623 cortico-cerebellar connectivity and writing dysfluency. Our study also proposes key  
624 associations between subcortical-cerebellum and intra-cerebellar connectivity and  
625 behavior of writing dysfluency that warrant further investigation in future studies.

626 A key role of the cerebellum has also been described in individuals with cervical  
627 dystonia. A brain network derived from lesion network mapping and applied in rest-fMRI  
628 from cervical dystonia and healthy controls demonstrated that positive connectivity to  
629 the cerebellum and negative connectivity to the somatosensory cortex were specific  
630 markers for cervical dystonia (33). Furthermore, two weeks of cTBS-TMS to bilateral  
631 cerebellum resulted in clinical improvement in cervical dystonia (34). In DYT1-TOR1A  
632 dystonia, tractography examining cerebellar outflow tracts showed that lower measures  
633 of white matter were associated with poorer performance in a sequence learning task  
634 (35). To the extent that other dystonias may share circuit mechanisms involving reduced  
635 cerebellar connectivity, our results advance the potential for 10 Hz rTMS to PSC to be  
636 used as a corrective approach. Intriguingly, our PSC-TMS protocol may also have utility  
637 in broader neuropsychiatric conditions.

638 There are several limitations of the present study to discuss. First, this study consisted  
639 of a small study cohort. Nonetheless, our approach here is that small, focused studies  
640 that deeply phenotype brain-behavior relationships using a within-subject repeated  
641 study design as performed in the present study can provide key insights into brain-  
642 behavior relationships in individuals with a disease to guide clinical care (36). Second,  
643 this study only examined acute responses. Future studies are needed to examine the  
644 longevity of this TMS effect and explore whether increasing stimulation sessions  
645 prolongs the duration of behavioral effects. Third, we cannot rule out the possibility of  
646 some co-activation of adjacent cortical areas such as primary motor cortex (M1) after  
647 TMS to PMC or PSC. However, irrespective of this possibility, there was still a main  
648 effect by stimulation site on the TMS-induced behavioral and brain effects suggesting  
649 that the TMS effect at each cortical site is distinct. Fourth, a potential confounding effect  
650 of the present study is that two active stimulations and one sham condition were  
651 randomly assigned to each participant across three sequential study visits. Future  
652 studies dedicated to a single stimulation site would remove this potential confound and  
653 allow us to evaluate the longevity of each TMS condition. A fifth limitation of the present  
654 study is that we constrained analyses to the motor network because of its relevance to  
655 dystonia and to reduce multiple hypothesis testing in a study with limited group sizes.  
656 There may be significant effects in regions outside of the motor circuitry that warrant  
657 consideration if we use larger dystonia study cohorts.

658 In summary, identifying the optimal stimulation site for engaging and improving the  
659 abnormal motor circuit mechanisms in dystonia is a major goal necessary for effectively  
660 applying TMS-related interventions for dystonia. This study used a within-participant,  
661 sham-controlled study design in writer's cramp dystonia, coupled with functional  
662 neuroimaging and behavior to address these unknowns. Demonstrating that TMS to  
663 PSC provides a significant behavioral benefit is a critical first step in moving TMS  
664 toward clinical therapy for dystonia. Furthermore, delineating the TMS induced  
665 corrective changes in the motor network associated with behavioral improvement in  
666 dystonia generates mechanistic hypotheses to guide future therapeutic interventions.  
667 The pattern of brain-behavior changes observed after PSC-TMS in this study may also  
668 serve as a brain signature for a clinical response to use as a screening tool with other  
669 interventional modalities.

670  
671  
672

## REFERENCES

- 673 1. Ortiz R, Scheperjans F, Mertsalmi T, Pekkonen E. The prevalence of adult-onset isolated  
674 dystonia in Finland 2007-2016. *PLoS One*. 2018;13(11):e0207729.
- 675 2. Albanese A, Bhatia K, Bressman SB, DeLong MR, Fahn S, Fung VS, et al.  
676 Phenomenology and classification of dystonia: a consensus update. *Mov Disord*.  
677 2013;28(7):863-73.
- 678 3. Morrison-Ham J, Clark GM, Ellis EG, Cerins A, Joutsa J, Enticott PG, et al. Effects of  
679 non-invasive brain stimulation in dystonia: a systematic review and meta-analysis. *Ther*  
680 *Adv Neurol Disord*. 2022;15:17562864221138144.
- 681 4. Strafella AP, Ko JH, Grant J, Fraraccio M, Monchi O. Corticostriatal functional  
682 interactions in Parkinson's disease: a rTMS/[11C]raclopride PET study. *Eur J Neurosci*.  
683 2005;22(11):2946-52.
- 684 5. Sack AT, Paneva J, Kuthe T, Dijkstra E, Zwieneberg L, Arns M, et al. Target  
685 Engagement and Brain State Dependence of Transcranial Magnetic Stimulation:  
686 Implications for Clinical Practice. *Biol Psychiatry*. 2024;95(6):536-44.
- 687 6. Borgomaneri S, Battaglia S, Garofalo S, Tortora F, Avenanti A, di Pellegrino G. State-  
688 Dependent TMS over Prefrontal Cortex Disrupts Fear-Memory Reconsolidation and  
689 Prevents the Return of Fear. *Curr Biol*. 2020;30(18):3672-9 e4.
- 690 7. Voyvodic JT. Real-time fMRI paradigm control, physiology, and behavior combined  
691 with near real-time statistical analysis. *Neuroimage*. 1999;10(2):91-106.
- 692 8. Esteban O, Ciric R, Finc K, Blair RW, Markiewicz CJ, Moodie CA, et al. Analysis of  
693 task-based functional MRI data preprocessed with fMRIPrep. *Nat Protoc*.  
694 2020;15(7):2186-202.
- 695 9. Awiszus F. TMS and threshold hunting. In: Elsevier, ed. In *Supplements to Clinical*  
696 *neurophysiology*; 2003:13-23.
- 697 10. Smith JE, Peterchev AV. Electric field measurement of two commercial active/sham  
698 coils for transcranial magnetic stimulation. *J Neural Eng*. 2018;15(5):054001.
- 699 11. Dannhauer M, Huang Z, Beynel L, Wood E, Bukhari-Parlakturk N, Peterchev AV. TAP:  
700 targeting and analysis pipeline for optimization and verification of coil placement in  
701 transcranial magnetic stimulation. *J Neural Eng*. 2022;19(2).
- 702 12. Gomez LJ, Dannhauer M, Peterchev AV. Fast computational optimization of TMS coil  
703 placement for individualized electric field targeting. *Neuroimage*. 2021;228:117696.



- 704 13. Bukhari-Parlakturk N, Lutz MW, Al-Khalidi HR, Unnithan S, Wang JE, Scott B, et al.  
705 Suitability of Automated Writing Measures for Clinical Trial Outcome in Writer's  
706 Cramp. *Mov Disord.* 2023;38(1):123-32.
- 707 14. Gallea C, Horovitz SG, Najee-Ullah M, Hallett M. Impairment of a parieto-premotor  
708 network specialized for handwriting in writer's cramp. *Hum Brain Mapp.*  
709 2016;37(12):4363-75.
- 710 15. Dresel C, Li Y, Wilzeck V, Castrop F, Zimmer C, Haslinger B. Multiple changes of  
711 functional connectivity between sensorimotor areas in focal hand dystonia. *J Neurol*  
712 *Neurosurg Psychiatry.* 2014;85(11):1245-52.
- 713 16. Simonyan K, Cho H, Hamzehei Sichani A, Rubien-Thomas E, Hallett M. The direct basal  
714 ganglia pathway is hyperfunctional in focal dystonia. *Brain.* 2017;140(12):3179-90.
- 715 17. Gianni C, Pasqua G, Ferrazzano G, Tommasin S, De Bartolo MI, Petsas N, et al. Focal  
716 Dystonia: Functional Connectivity Changes in Cerebellar-Basal Ganglia-Cortical Circuit  
717 and Preserved Global Functional Architecture. *Neurology.* 2022;98(14):e1499-e509.
- 718 18. Iacono D, Geraci-Erck M, Peng H, Rabin ML, Kurlan R. Reduced Number of Pigmented  
719 Neurons in the Substantia Nigra of Dystonia Patients? Findings from Extensive  
720 Neuropathologic, Immunohistochemistry, and Quantitative Analyses. *Tremor Other*  
721 *Hyperkinet Mov (N Y).* 2015;5.
- 722 19. Dadi K, Varoquaux G, Machlouzariides-Shalit A, Gorgolewski KJ, Wassermann D,  
723 Thirion B, et al. Fine-grain atlases of functional modes for fMRI analysis. *Neuroimage.*  
724 2020;221:117126.
- 725 20. Z. S. Rectangular Confidence Regions for the Means of Multivariate Normal  
726 Distributions. *Journal of the American Statistical Association.* 1967;62(318):626-33.
- 727 21. Hochberg Y, Benjamini Y. More powerful procedures for multiple significance testing.  
728 *Stat Med.* 1990;9(7):811-8.
- 729 22. McCulloch CE, Searle SR, Neuhaus JM. Generalized, linear, and mixed models. Second  
730 edition. ed. Hoboken, New Jersey: John Wiley & Sons, Inc; 2008.
- 731 23. Enomoto H, Terao Y, Kadowaki S, Nakamura K, Moriya A, Nakatani-Enomoto S, et al.  
732 Effects of L-Dopa and pramipexole on plasticity induced by QPS in human motor cortex.  
733 *J Neural Transm (Vienna).* 2015;122(9):1253-61.
- 734 24. Siebner HR, Filipovic SR, Rowe JB, Cordivari C, Gerschlagler W, Rothwell JC, et al.  
735 Patients with focal arm dystonia have increased sensitivity to slow-frequency repetitive  
736 TMS of the dorsal premotor cortex. *Brain.* 2003;126(Pt 12):2710-25.
- 737 25. Havrankova P, Jech R, Walker ND, Operto G, Tauchmanova J, Vymazal J, et al.  
738 Repetitive TMS of the somatosensory cortex improves writer's cramp and enhances  
739 cortical activity. *Neuro Endocrinol Lett.* 2010;31(1):73-86.
- 740 26. Kaas J. Somatosensory System. In: JK PGM, ed. *The Human Nervous System.* London:  
741 Elsevier Academic Press; 2004:1061-93.
- 742 27. Bianchi S, Fuertinger S, Huddleston H, Frucht SJ, Simonyan K. Functional and structural  
743 neural bases of task specificity in isolated focal dystonia. *Mov Disord.* 2019;34(4):555-  
744 63.
- 745 28. Mantel T, Meindl T, Li Y, Jochim A, Gora-Stahlberg G, Kraenbring J, et al. Network-  
746 specific resting-state connectivity changes in the premotor-parietal axis in writer's cramp.  
747 *Neuroimage Clin.* 2018;17:137-44.

- 748 29. Naumann M, Magyar-Lehmann S, Reiners K, Erbguth F, Leenders KL. Sensory tricks in  
749 cervical dystonia: perceptual dysbalance of parietal cortex modulates frontal motor  
750 programming. *Ann Neurol.* 2000;47(3):322-8.
- 751 30. de Vries PM, de Jong BM, Bohning DE, Hinson VK, George MS, Leenders KL. Reduced  
752 parietal activation in cervical dystonia after parietal TMS interleaved with fMRI. *Clin*  
753 *Neurol Neurosurg.* 2012;114(7):914-21.
- 754 31. Merchant SHI, Frangos E, Parker J, Bradson M, Wu T, Vial-Undurraga F, et al. The role  
755 of the inferior parietal lobule in writer's cramp. *Brain.* 2020;143(6):1766-79.
- 756 32. Corp DT, Greenwood CJ, Morrison-Ham J, Pullinen J, McDowall GM, Younger EFP, et  
757 al. Clinical and Structural Findings in Patients With Lesion-Induced Dystonia:  
758 Descriptive and Quantitative Analysis of Published Cases. *Neurology.*  
759 2022;99(18):e1957-e67.
- 760 33. Corp DT, Joutsa J, Darby RR, Delnooz CCS, van de Warrenburg BPC, Cooke D, et al.  
761 Network localization of cervical dystonia based on causal brain lesions. *Brain.*  
762 2019;142(6):1660-74.
- 763 34. Koch G, Porcacchia P, Ponzio V, Carrillo F, Caceres-Redondo MT, Brusa L, et al. Effects  
764 of two weeks of cerebellar theta burst stimulation in cervical dystonia patients. *Brain*  
765 *Stimul.* 2014;7(4):564-72.
- 766 35. Carbon M, Argyelan M, Ghilardi MF, Mattis P, Dhawan V, Bressman S, et al. Impaired  
767 sequence learning in dystonia mutation carriers: a genotypic effect. *Brain.* 2011;134(Pt  
768 5):1416-27.
- 769 36. Gratton C, Nelson SM, Gordon EM. Brain-behavior correlations: Two paths toward  
770 reliability. *Neuron.* 2022;110(9):1446-9.  
771  
772

773  
774

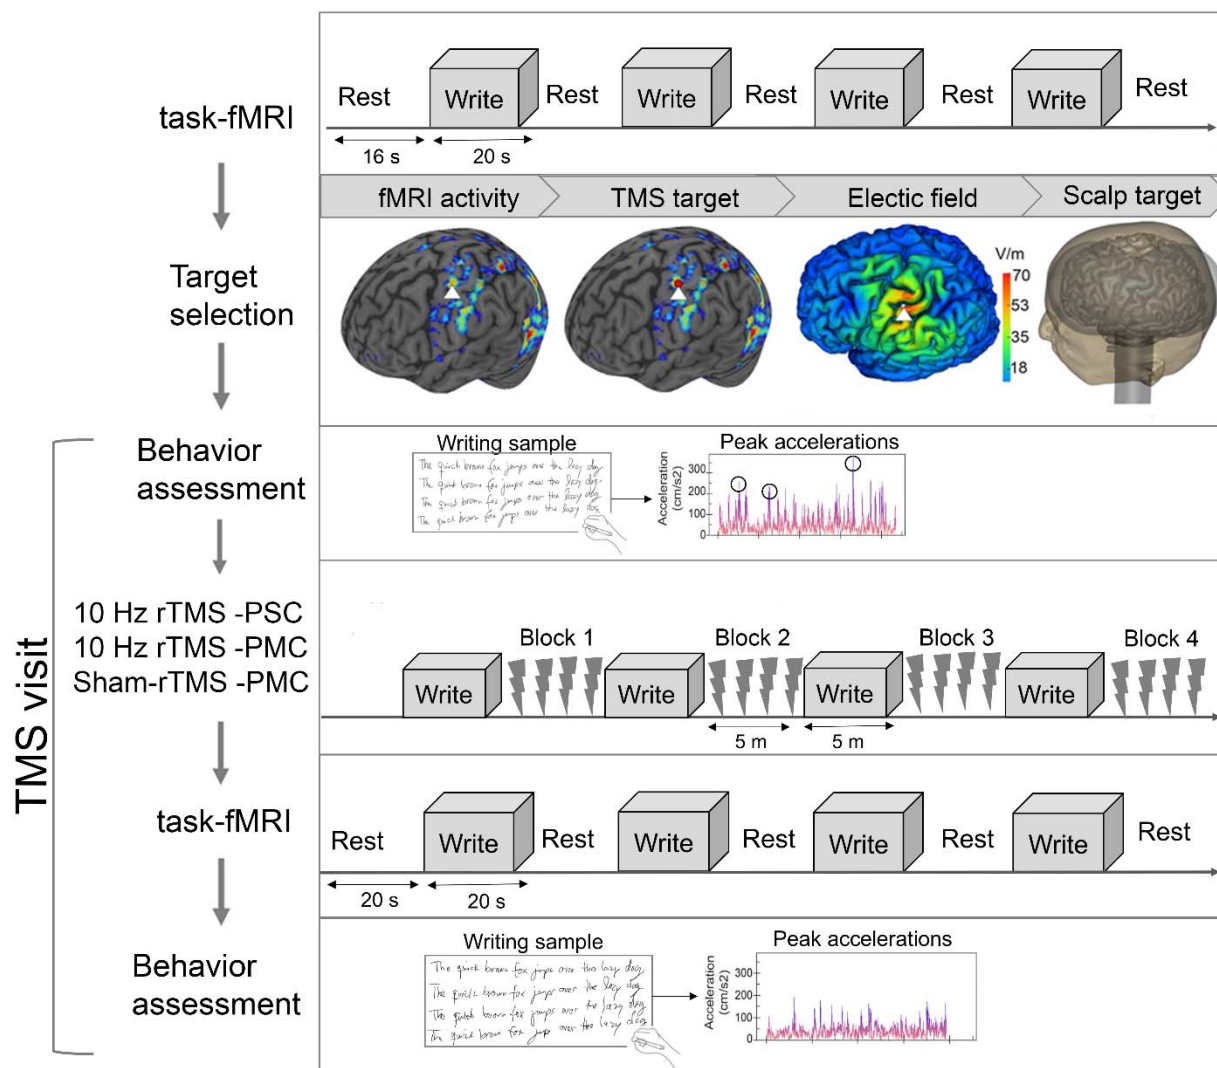

775  
776  
777  
778  
779  
780  
781  
782  
783  
784  
785  
786  
787  
788  
789  
790

**Figure 1: TMS target selection and TMS delivery.** To select a scalp target for TMS delivery, each subject completed a task-based fMRI at baseline. An individualized scalp target to motor/premotor cortex (PMC) and primary somatosensory cortex (PSC, represented by a red sphere) was then prepared using fMRI and electric field modeling. Subjects received three TMS conditions: 10 Hz rTMS to PSC, 10 Hz rTMS to PMC and Sham rTMS to PMC (total 4,000 pulses). Each TMS condition was delivered over four stimulation blocks during a single visit. To prime the writing motor network during TMS delivery and circumvent concerns that delivering TMS concurrently during a writing task would compromise stimulation accuracy, an interleaved approach of writing task and stimulation blocks was designed. TMS effect was measured using writing behavior and task-based fMRI.

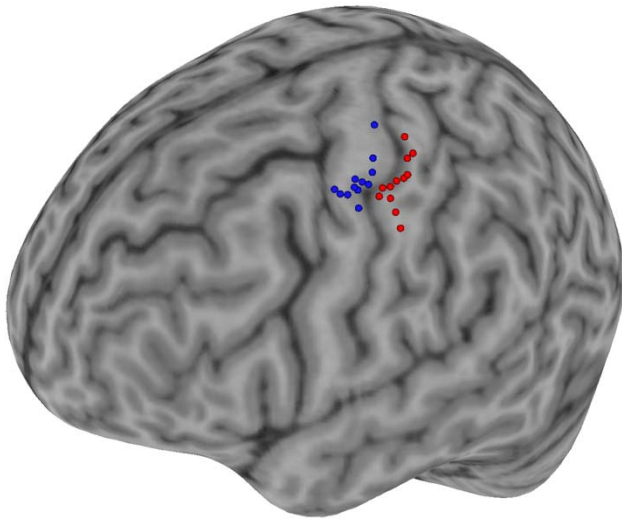

791  
792  
793  
794  
795  
796  
797  
798  
799  
800  
801

**Figure 2: Individualized targets for rTMS to PMC and PSC in WC.** The cortical target for rTMS delivery to left PMC (blue) and left PSC (red) was developed using fMRI and electric field modeling. The final target for PMC-TMS and PSC-TMS for each WC participant is shown overlaid on a standard MNI brain.



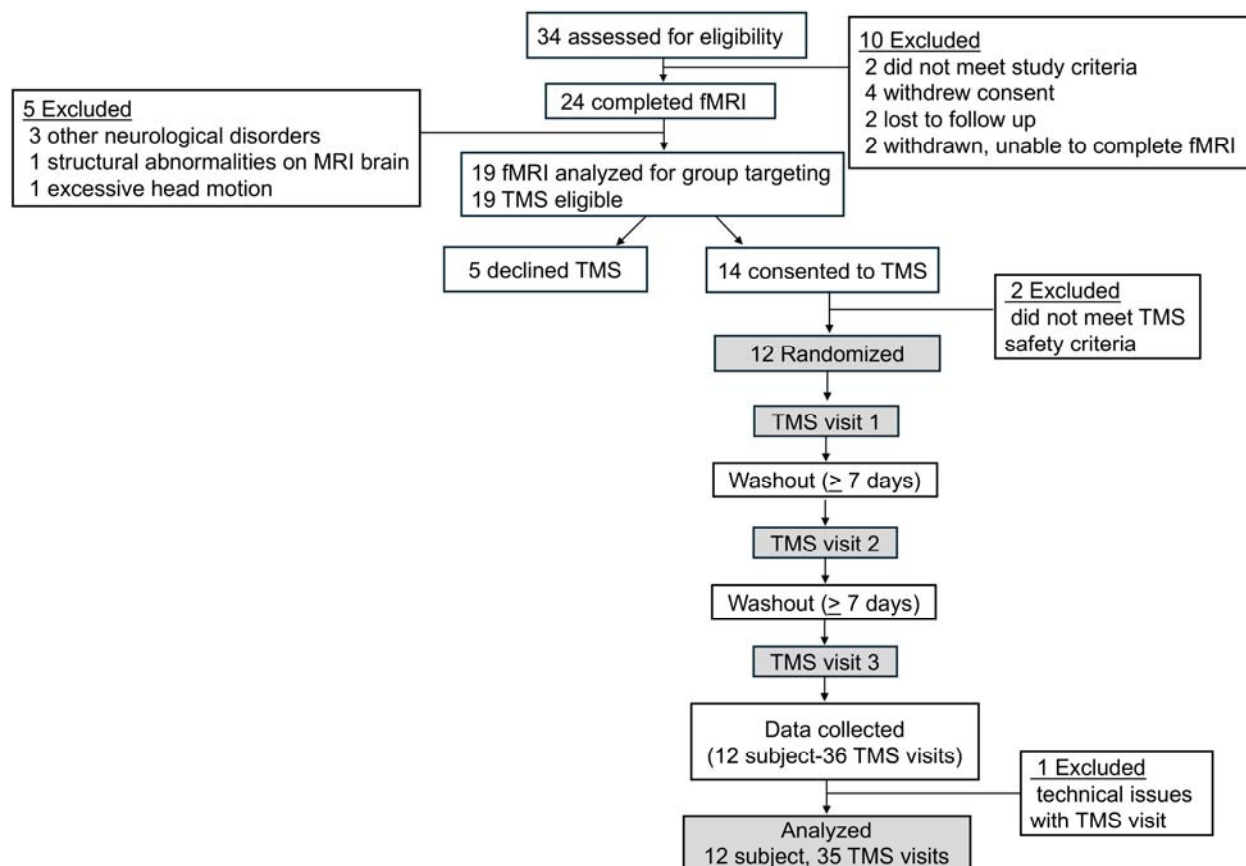

802  
803  
804  
805  
806  
807  
808

**Figure 3: Consort diagram showing the recruitment, inclusion and exclusion number of participants.** Total of 34 WC dystonia participants were screened. 24 participants completed fMRI, 14 consented to the TMS study. Of these, 12 participants were randomized and completed the TMS study.

809

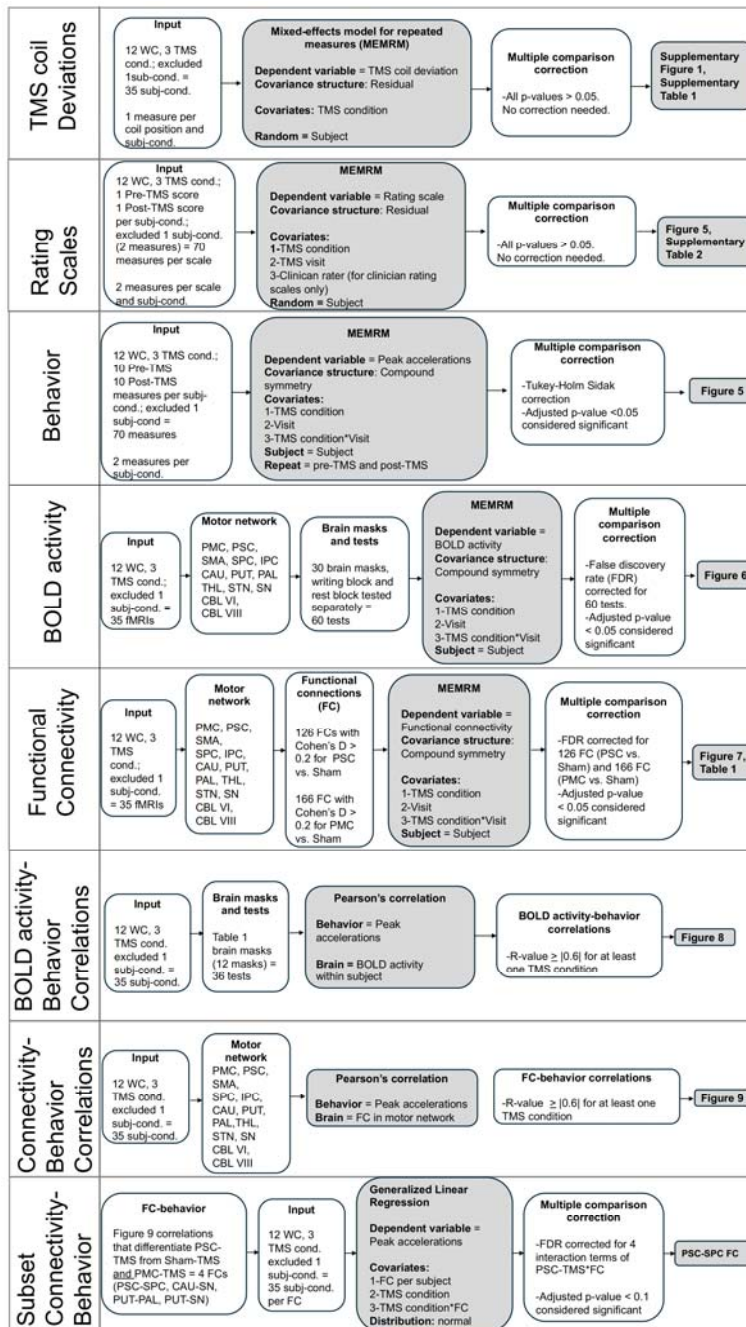

810  
811  
812  
813  
814  
815  
816  
817  
818  
819  
820

**Figure 4: Schematic overview of study data and analytical pipeline.** The diagram illustrates the key datasets collected and analyzed in the study. For each dataset, the statistical models, multiple comparison correction methods, and the corresponding figure and/or table resulting from the dataset are reported. Mixed-effects model for repeated measures (MEMRM) was employed with covariates and covariance structures tailored to each dataset. Correlations were performed using Pearson's R to understand the relationship between peak accelerations, BOLD activity, and functional connectivity. Multiple comparison corrections were performed where applicable.

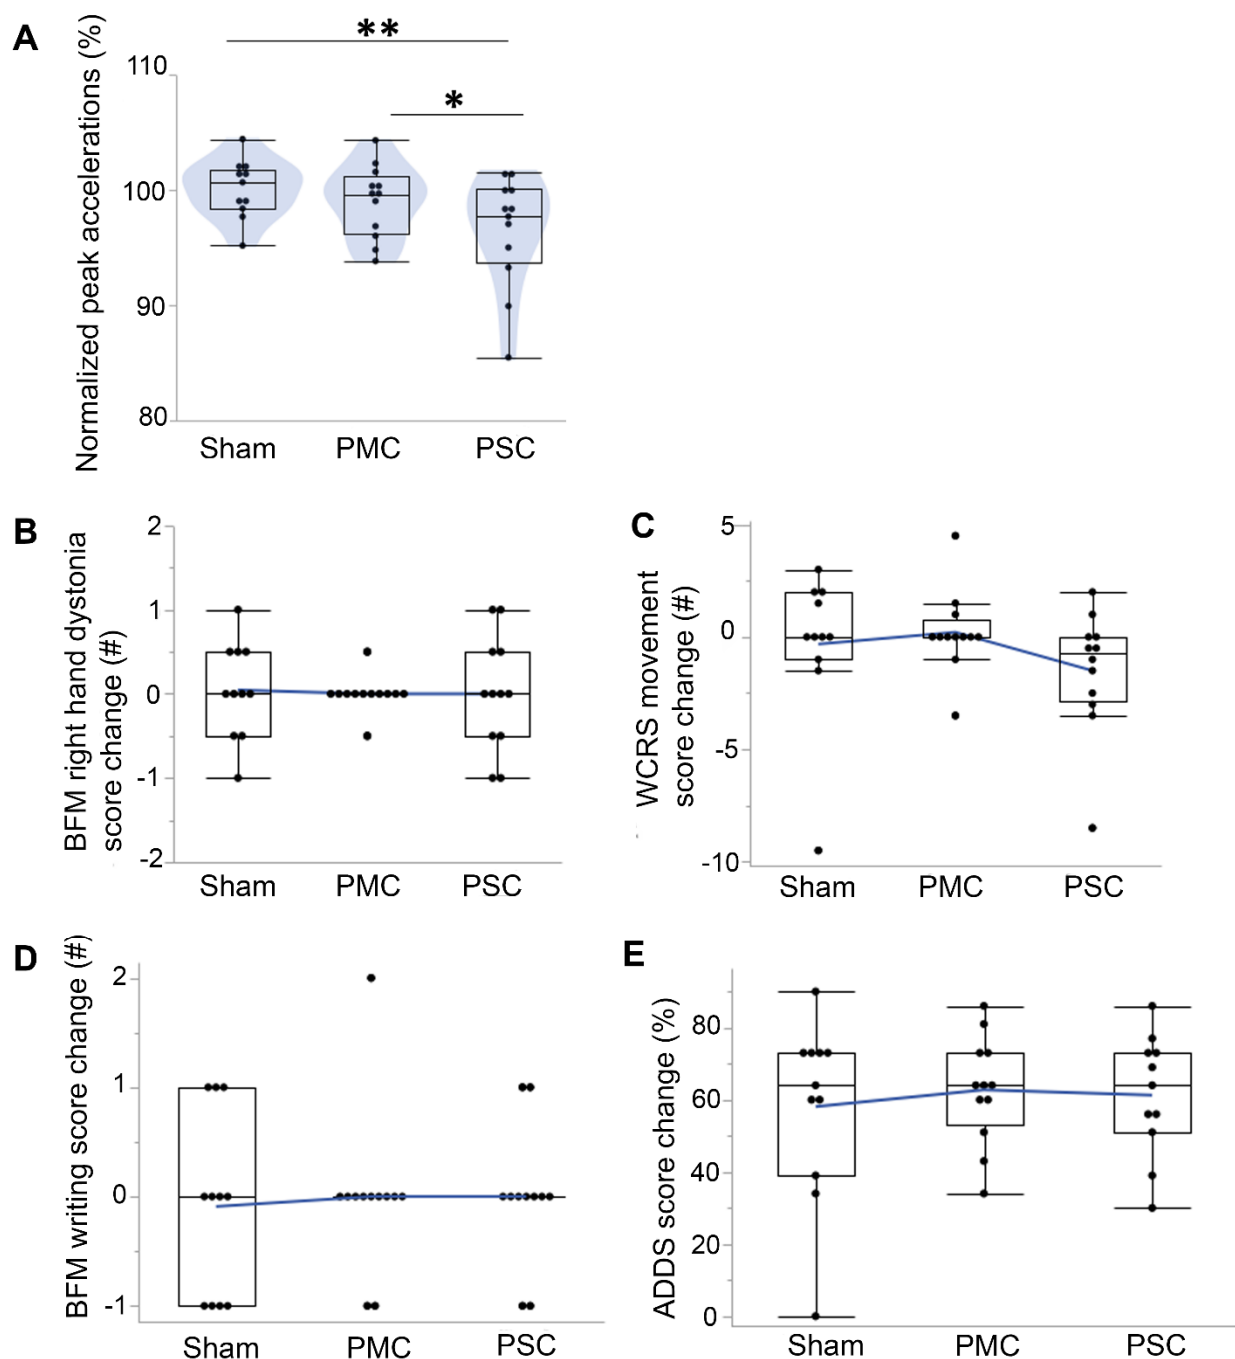

821  
 822 **Figure 5: 10 Hz rTMS to PSC, but not PMC, reduced writing dysfluency in WC.** A) 10 Hz  
 823 rTMS to PSC significantly reduced a measure of writing dysfluency called peak accelerations  
 824 compared to sham-TMS in a within-subject analysis in WC participants. PMC-TMS did not show  
 825 significant differences in writing dysfluency compared to sham-TMS. Each data point represents  
 826 the mean change in peak accelerations for each TMS condition with higher measures  
 827 representing worsening writing dysfluency. **B-E)** The effect of TMS on right hand dystonia in WC  
 828 participants was also compared using the clinician-rated scales of B) Burke Fahn Marsden  
 829 (BFM) right hand dystonia and C) Writer's Cramp Rating Scale (WCRS) movement scores. TMS  
 830 effect on WC participants' right-hand disability was reported using the D) BFM handwriting

831 disability score and **E**) Arms Dystonia Disability Scale (ADDS). All rating scales were performed  
832 before and after each TMS condition. Each data point on the graph represents a subject's score  
833 change (Post-TMS minus Pre-TMS) in the scale. \*\* $p < 0.01$ , \* $p < 0.05$  after MEMRM test and  
834 Tukey-Holm Sidak correction.  
835  
836  
837  
838



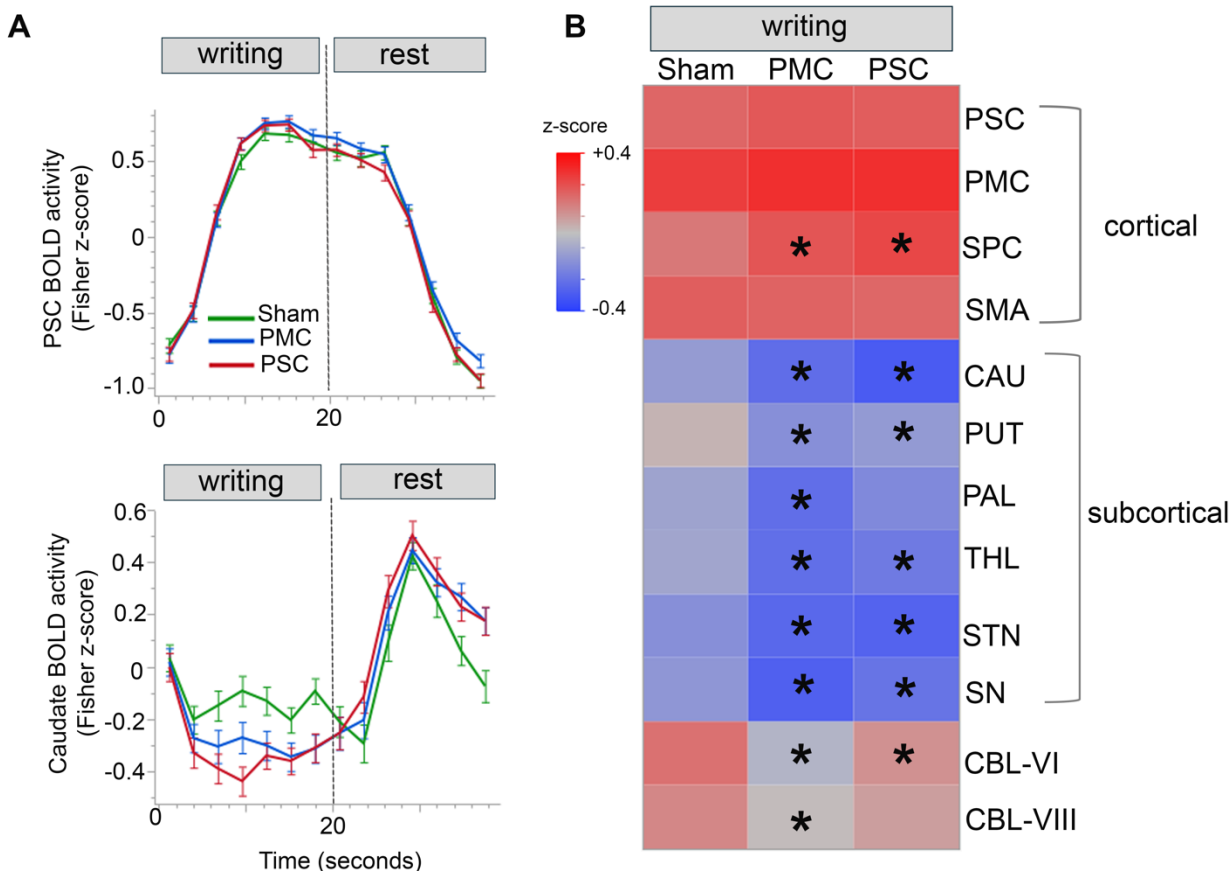

839  
840  
841  
842  
843  
844  
845  
846  
847  
848  
849  
850  
851  
852  
853  
854  
855  
856  
857  
858  
859  
860  
861  
862  
863  
864

**Figure 6: 10 Hz rTMS to either PMC or PSC decreased subcortical activity in the motor network.** **A)** Graphs represent mean BOLD activity during the writing and rest blocks after each TMS condition [sham-TMS (green), PMC-TMS (blue) and PSC-TMS (red)]. The mean BOLD activity is presented for brain regions of the primary somatosensory cortex (PSC, top graph) and caudate (bottom graph, PSC vs. Sham: -0.19,  $p < 0.0001$ , PMC vs. Sham -0.14,  $p < 0.001$ , PSC vs. PMC: 0.05,  $p = 0.14$ , MEMRM and FDR-corrected at  $p < 0.05$ ). **B)** Heatmap represents mean BOLD activity during the writing block for subregions of the motor network across the three TMS conditions. Asterisks indicate significant difference in mean BOLD activity for PMC-TMS or PSC-TMS compared to sham-TMS (MEMRM and FDR-corrected at  $p < 0.05$ ). SPC: superior parietal cortex, SMA: supplementary motor area, CAU: caudate, PUT: putamen, PAL: pallidum, THL: thalamus, STN: subthalamic nucleus, SN: substantia nigra, CBL-VI: cerebellum, lobule VI and CBL-VIII: cerebellum, lobule VIII.

865  
866  
867  
868  
869  
870

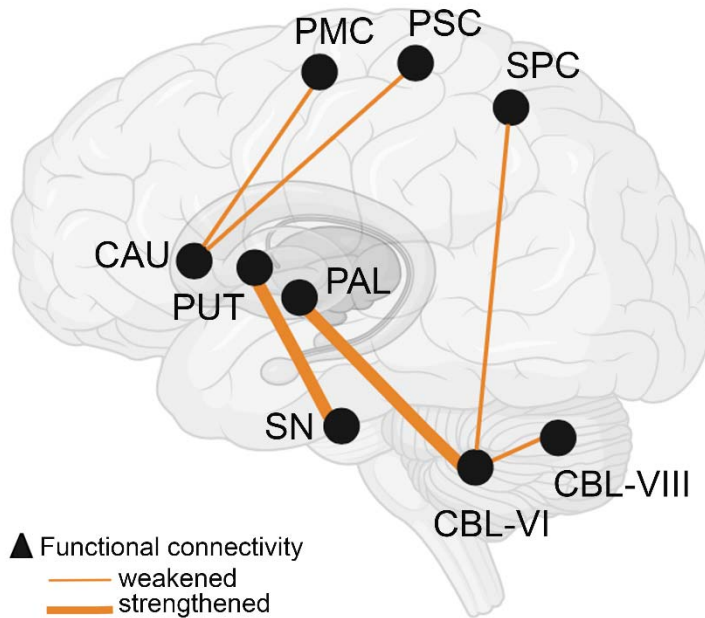

871  
872  
873  
874  
875  
876  
877  
878  
879  
880  
881  
882  
883  
884  
885  
886  
887  
888  
889  
890  
891  
892  
893  
894  
895

**Figure 7: 10 Hz rTMS to PSC but not PMC induced changes in cortical-subcortical connectivity in the motor network compared to sham-TMS.** The brain model represents TMS induced changes in functional connectivity (FC) in the motor network. Black circles represent brain regions in the motor network and connecting lines indicate FC changes between these regions. Line thickness denotes the direction of FC change (thin line: weakened FC, thick line: strengthened FC). Only FC that were significantly different between PSC-TMS and sham-TMS ( $p < 0.05$ , MEMRM with FDR correction) are shown. No significant FC changes were observed after PMC-TMS compared to sham-TMS. Detailed FC values for PSC-TMS versus sham-TMS are provided in Table 1. PMC: premotor cortex; PSC: primary somatosensory cortex; SPC: superior parietal cortex; CAU: caudate; PUT: putamen; PAL: pallidum; SN: substantia nigra; R-CBL VI: right cerebellum lobule VI; R-CBL-VIII: right cerebellum lobule VIII.

896  
897  
898  
899  
900  
901

**Table 1: Changes in functional connectivity induced by PSC-TMS compared to sham-TMS in the motor network**

| Brain Regions          | Functional connections | FC mean z-score (SE) |             | Mixed-effects Model for Repeated Measures |      |         |          |
|------------------------|------------------------|----------------------|-------------|-------------------------------------------|------|---------|----------|
|                        |                        | Sham                 | PSC         | PSC vs. Sham Mean FC difference           | SE   | t-ratio | p-value* |
| Cortical-striatal      | PMC-CAU                | 0.49 (0.03)          | 0.33 (0.03) | -0.17                                     | 0.04 | -4.49   | 0.015    |
|                        | PSC-CAU                | 0.23 (0.03)          | 0.10 (0.03) | -0.13                                     | 0.03 | -4.17   | 0.015    |
| Cortico-cerebellar     | SPC-RCBL-VIII          | 0.44 (0.03)          | 0.27 (0.04) | -0.15                                     | 0.05 | -3.38   | 0.048    |
| Subcortico-subcortical | PAL-CBL-VI             | 0.13 (0.04)          | 0.22 (0.04) | +0.17                                     | 0.05 | 3.61    | 0.041    |
|                        | PUT-SN                 | 0.48 (0.04)          | 0.59 (0.03) | +0.16                                     | 0.04 | 3.53    | 0.042    |
| Intra-cerebellar       | R-CBL VI-VIII          | 0.51 (0.04)          | 0.40 (0.05) | -0.18                                     | 0.04 | -4.28   | 0.015    |
|                        | R-CBL VI-VIII          | 0.45 (0.03)          | 0.30 (0.05) | -0.20                                     | 0.05 | -4.12   | 0.015    |

902  
903  
904  
905  
906  
907

PMC: premotor cortex; CAU: caudate, PSC: primary somatosensory cortex; SPC: superior parietal cortex; R-CBL-VIII: right cerebellum lobule VIII; PAL: pallidum; PUT: putamen; SN: substantia nigra; R-CBL VI: right cerebellum lobule VI; **SE**: Standard Error, \*p-values after MEMRM and FDR correction.

908  
909  
910

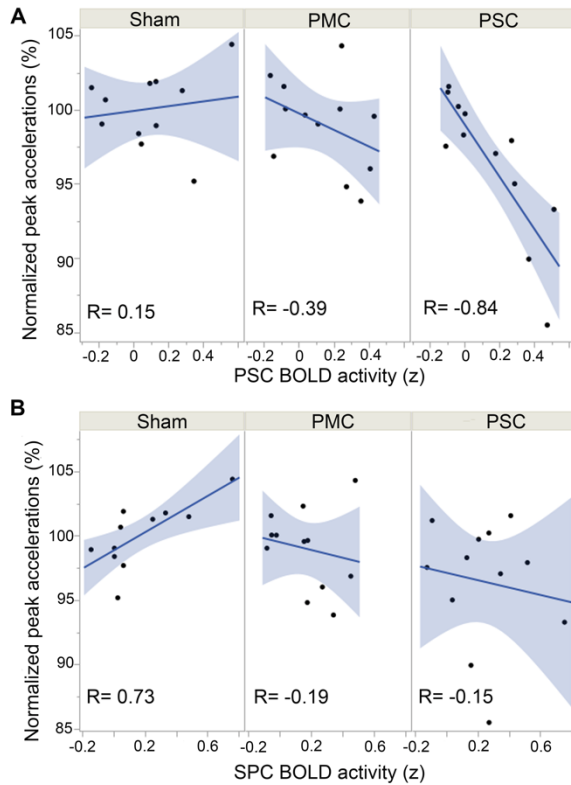

911  
912  
913  
914  
915  
916  
917  
918  
919  
920  
921  
922  
923  
924  
925  
926  
927  
928  
929  
930  
931  
932  
933  
934  
935

**Figure 8: TMS-induced change in BOLD activity at PSC and SPC correlated with reduced writing dysfluency.** Graphs represent the correlation between BOLD activity at A) primary somatosensory cortex (x-axis) and B) superior parietal cortex (x-axis) with behavior of peak accelerations (y-axis) for the three TMS conditions. Each data point represents the correlation between a WC participant's regional BOLD activity and peak accelerations behavior for each TMS condition. Shaded blue regions represent the confidence region for the fitted lines. A Pearson's correlation (R) is reported for each BOLD activity-behavior correlation and TMS condition.



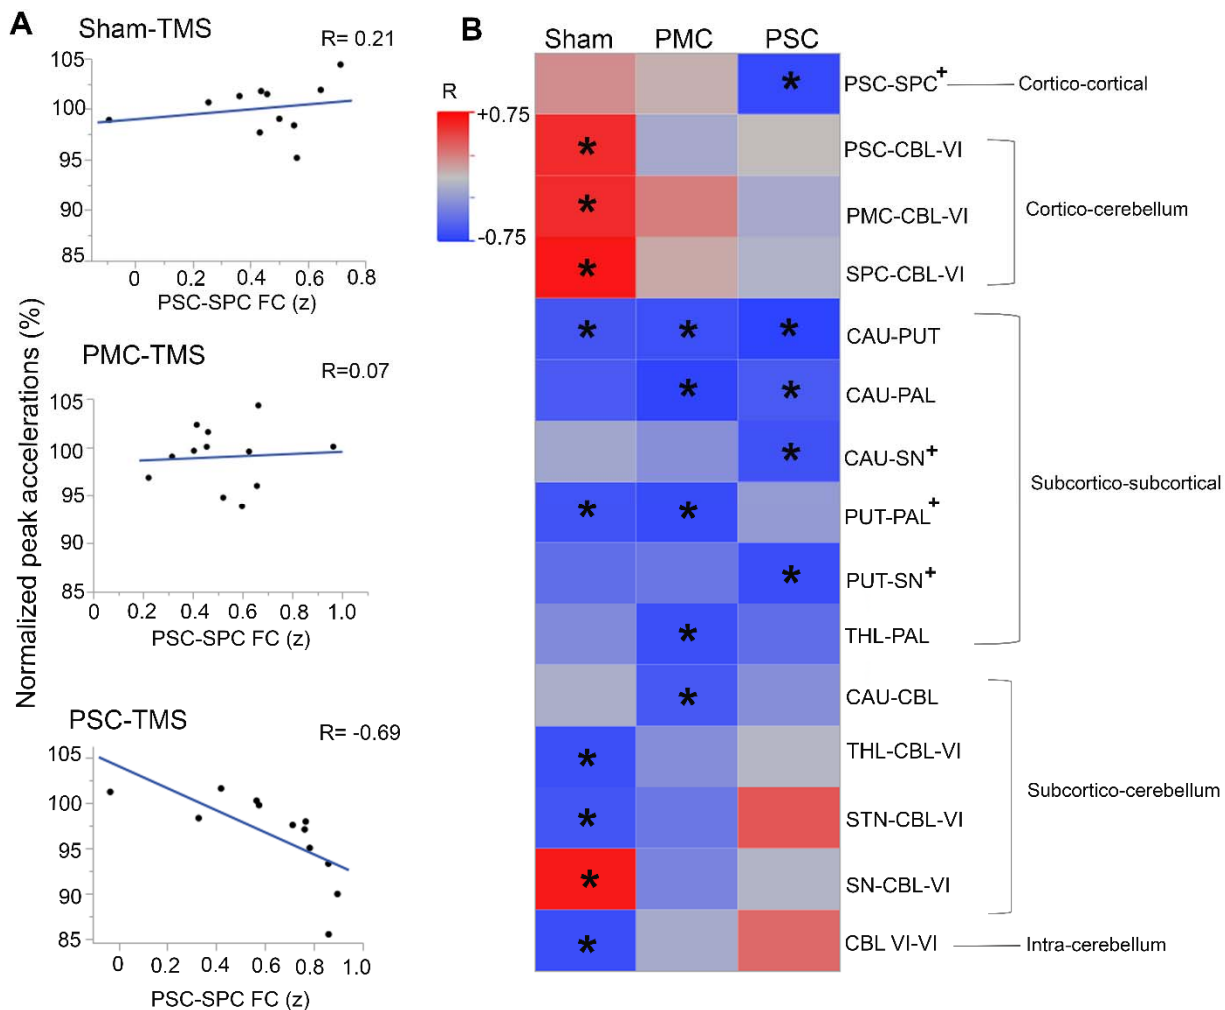

936  
937  
938  
939  
940  
941  
942  
943  
944  
945  
946  
947  
948  
949  
950  
951  
952  
953  
954  
955  
956  
957

**Figure 9: Reorganization of the motor network connectivity after PSC-TMS correlated with reduced writing dysfluency.** **A)** Graph represents the correlation between functional connectivity (FC) (x-axis) and peak accelerations behavior (y-axis) for the 12 WC subjects and three TMS conditions. Each data point represents a WC participant's FC-behavior relationship. The representative scatter plots are organized by TMS condition and shown for the relationship between PSC-SPC FC to peak accelerations behavior. WC subjects showed no FC-behavior correlation for conditions of sham-TMS ( $R = 0.21$ ) or PMC-TMS ( $R = 0.07$ ). But there is an inverse correlation between PSC-SPC FC and peak accelerations behavior after PSC-TMS ( $R = -0.69$ ). **B)** A heatmap of the mean correlation between FCs in the writing motor network and peak accelerations behavior. Each box represents the mean correlation ( $R$ ) between peak accelerations behavior and a FC for each TMS condition (red box = positive FC-behavior correlation, blue box = negative FC-behavior correlation). Heatmap is reported only for FCs that show  $R \geq |0.6|$  for at least one TMS condition (indicated by an asterisk) and compared with the other two TMS conditions. A subset FC-behavior analysis was performed to compare the four FC-behavior relationships that differentiate PSC-TMS from both sham-TMS and PMC-TMS (indicated by "+"). Across the four FC-behavior relationships, strengthening of PSC-SPC connectivity correlated with significant reduction in peak accelerations behavior after PSC-TMS compared to sham-TMS (PSC vs. Sham:  $-14.6$ ,  $p = 0.075$ , generalized linear regression, and FDR correction).
